**Seven new Neocallimastigomycota genera from fecal samples of wild, zoo-housed, and domesticated herbivores: Description of *Ghazallomyces constrictus* gen. nov., sp. nov., *Aklioshbomyces papillarum* gen. nov., sp. nov., *Agriosomyces longus* gen. nov., sp. nov., *Capellomyces foraminis* gen. nov., sp. nov. and *Capellomyces elongatus* sp. nov., *Joblinomyces apicalis* gen. nov., sp. nov., *Khoyollomyces ramosus* gen. nov., sp. nov., and *Tahromyces munnarensis* gen. nov., sp. nov.**

Radwa A. Hanafy<sup>1</sup>, Vikram B. Lanjekar<sup>2</sup>, Prashant K. Dhakephalkar<sup>2</sup>, Tony M. Callaghan<sup>3</sup>,  
Sumit S. Dagar<sup>2</sup>, Gareth W. Griffith<sup>3</sup>, Mostafa S. Elshahed<sup>1</sup>, and Noha H. Youssef<sup>1\*</sup>

<sup>1</sup>Department of Microbiology and Molecular Genetics, Oklahoma State University, Stillwater, OK. <sup>2</sup>Bioenergy group, Agharkar Research Institute, Pune, India. <sup>3</sup>Institute of Biological, Environmental, and Rural Sciences (IBERS) Aberystwyth University, Aberystwyth, Wales, UK.

\*Correspondence: Noha H. Youssef: [Noha@Okstate.edu](mailto:Noha@Okstate.edu).

1 **ABSTRACT**

2 We isolated and characterized sixty-five anaerobic gut fungi (AGF, Neocallimastigomycota)  
3 strains from fecal samples of five wild (W), one zoo-housed (Z), and three domesticated (D)  
4 herbivores in the US states of Texas (TX) and Oklahoma (OK), Wales (WA), and the Indian  
5 states of Kerala (KE) and Haryana (HA). Phylogenetic assessment based on D1-D2 region of the  
6 large rRNA subunit (LSU) identified seven distinct lineages, with strains recovered from Axis  
7 Deer (W-TX) clustering within the *Orpinomyces-Neocallimastix-Pecoramyces-Feramyces* clade;  
8 Boer Goat-domesticated Goat strains (W-TX, D-KE) clustering within the *Oontomyces-*  
9 *Anaeromyces-Liebetanzomyces* clade; and domesticated Goat and Sheep strains (D-HA) as well  
10 as Nilgiri Tahr strains (W-KE) forming two distinct clades associated with genus  
11 *Buwchfawromyces*. The remaining three lineages, represented by strains recovered from  
12 Mouflon-Boer Goat (W-TX), White Tailed Deer (W-OK), and Zebra-Horse (Z-OK, and D-WA),  
13 displayed no specific suprageneric affiliation. All strains displayed monocentric thalli and  
14 produced mono/uniflagellate zoospores with the exception of Axis Deer strains, which produced  
15 polyflagellate zoospores. Isolates displayed multiple interesting microscopic features including  
16 sporangia with tightly constricted necks and fine septa at the base (Axis Deer), papillated and  
17 pseudo-intercalary sporangia (White-Tailed Deer), swollen sporangiophores and zoospores with  
18 long flagella (Mouflon-Boer Goat), zoospore release through an apical pore followed by either  
19 sporangial wall collapse (Axis Deer and Boer Goat-domesticated Goat) or sporangial wall  
20 remaining intact after discharge (Zebra-Horse), multi-sporangiated thalli with branched  
21 sporangiophores (Zebra-Horse), and short sporangiophores with subsporangial swellings (Nilgiri  
22 Tahr). Internal transcribed spacer-1 region (ITS-1) sequence analysis indicated that Zebra-Horse  
23 strains are representatives of the AL1 lineage, frequently encountered in culture-independent

24 surveys of the alimentary tract and fecal samples from hindgut fermenters. The other six  
25 lineages, five of which were isolated from wild herbivores, have not been previously  
26 encountered in such surveys. Our results significantly expand the genus level diversity within the  
27 Neocallimastigomycota, and strongly suggest that wild herbivores represent a yet-untapped  
28 reservoir of AGF diversity. We propose the creation of seven novel genera and eight novel  
29 Neocallimastigomycota species to accommodate these strains, for which we propose the names  
30 *Agriosomyces longus* (Mouflon and wild Boer Goat), *Aklioshbomyces papillarum* (White tailed  
31 Deer), *Capellomyces foraminis* (wild Boar Goat) and *C. elongatus* (domesticated Goat),  
32 *Ghazallomyces constrictus* (Axis Deer), *Joblinomyces apicalis* (domesticated Goat and Sheep),  
33 *Khoyollomyces ramosus* (Zebra-Horse), and *Tahromyces munnarensis* (Nilgiri Tahr). The type  
34 species are strains Axs-31, WT-2, MS-4, BGB-11, GFKJa1916, GFH683, ZS-33, and  
35 TDFKJa193, respectively.

36 **KEY WORDS:** Anaerobic gut fungi, Neocallimastigomycota, Herbivores, 8 new taxa.

37 **INTRODUCTION**

38 Members of the anaerobic gut fungi (AGF, Phylum Neocallimastigomycota) colonize the  
39 alimentary tract of mammalian and reptilian herbivores (Gruninger and others 2014; Ljungdahl  
40 2008). Interest in the taxonomy, ecology, cell biology, and genomics of the  
41 Neocallimastigomycota has been driven by their unique habitat, physiological preferences, and  
42 evolutionary history, as well as by their possession of superior plant polymers degradation  
43 capacities (Youssef and others 2013). Such characteristics render them a promising platform for  
44 biofuel and biogas production from plant biomass (Ranganathan and others 2017; Young and  
45 others 2018).

46       Currently, eleven different AGF genera have been described (Ariyawansa 2015; Barr and  
47 others 1989 ; Breton and others 1990; Callaghan and others 2015; Dagar and others 2015; Gold  
48 and others 1988; Hanafy and others 2017; Hanafy and others 2018; Heath and others 1983; Joshi  
49 and others 2018; Li 2016; Ozkose and others 2001). However, it is reasonable to assume that  
50 multiple novel, yet-uncultured AGF lineages remain to be isolated and characterized. The  
51 inherent difficulty in isolating and maintaining these strictly anaerobic and senescence-prone  
52 organisms severely hampers isolation and characterization efforts, and limits the number of  
53 research groups dedicated to uncovering AGF diversity. Further, it is entirely plausible that  
54 multiple AGF taxa are extremely fastidious, with complex nutritional requirements that are not  
55 satisfied in current isolation protocols. Indeed, culture-independent diversity surveys utilizing the  
56 internal transcribed spacer 1 (ITS-1) as a phylogenetic marker demonstrated that multiple novel  
57 AGF lineages remain to be isolated and characterized (Kittelmann and others 2012;  
58 Liggenstoffer and others 2010; Paul and others 2018; Mura and others 2019).

59           On the other hand, culturing efforts have occasionally recovered novel AGF strains that  
60 bear no clear similarities to clades identified in culture-independent studies (Callaghan and  
61 others 2015; Joshi and others 2018). This surprising observation could be attributed to  
62 mismatches in the isolates' ITS-1 region to commonly utilized ITS-1 AGF primers (Callaghan  
63 and others 2015), extremely narrow host range of some AGF taxa (Callaghan and others 2015),  
64 or existence in extremely low relative abundance *in-situ*.

65           Moreover, it is important to note that while both culture-based and culture-independent  
66 surveys have reported the presence of AGF communities in a relatively wide range of animal  
67 hosts, such studies by no means represent an exhaustive catalogue of global AGF diversity in  
68 nature. For example, due to logistical considerations, the great majority of studies have utilized  
69 samples from domesticated herbivores, with efforts to isolate AGF strains from wild herbivores  
70 being extremely rare (Nagpal and others 2011; Paul and others 2010; Tuckwell and others 2005;  
71 Hanafy and others 2018).

72           In an effort to broaden the current Neocallimastigomycota global culture collection, we  
73 conducted a multi-year isolation effort targeting novel AGF taxa in fecal samples from a wide  
74 range of wild, zoo-housed, and domesticated herbivorous mammals. Here, we report on the  
75 isolation and characterization of seven novel AGF genera, including the first cultured  
76 representative of the hitherto uncultured AGF lineage AL1. The results expand the known AGF  
77 genus-level diversity by >50% (from 11–18), and strongly suggest that wild undomesticated  
78 herbivores represent a yet-untapped reservoir of novel AGF taxa.

79

## 80 MATERIALS AND METHODS

81 *Samples*— Fecal samples were obtained from Axis Deer (*Axis axis*), White Tailed Deer  
82 (*Odocoileus virginianus*), Mouflon Sheep (*Ovis orientalis*), and Boer Goat (*Capra aegagrus*) in  
83 two separate hunting expeditions in Sutton and Val Verde counties (TX), and Payne county (OK)  
84 in October 2017 and April 2018 (TABLE 1). The hunting parties had all appropriate licenses,  
85 and the animals were shot either on private land with the owner's consent or on public land  
86 during the hunting season. Samples were also obtained from a Grevy's Zebra (*Equus grevyi*)  
87 housed in the Oklahoma City Zoo in May 2018, with the sampling protocol approved by the  
88 Oklahoma City Zoo and Botanical Garden's Scientific Review Committee. All fecal samples  
89 were placed on ice on site, transferred to the laboratory within 24h of collection, where they were  
90 immediately used as an inoculum for subsequent enrichment and isolation procedures.

91 In India, dried fecal samples were obtained from Nilgiri Tahr (*Nilgiritragus hylocrius*), and  
92 domesticated but forest grazing Goat (*Capra aegagrus hircus*) in Munnar in the State of Kerala.  
93 Fresh fecal samples were also obtained from domesticated Goats and Sheep (*Ovis aries*) in  
94 Sonipat in the State of Haryana. Fresh fecal samples were transferred to the laboratory within  
95 24h of collection, while dried fecal samples were transferred within 72 hours of collection. In  
96 Wales, samples were obtained from two domesticated Horses in Llanbadarn Fawr, Ceredigion  
97 County, and promptly transferred to the laboratory for processing.

98 *Isolation procedures*— In the USA, isolation of anaerobic fungal strains was conducted as  
99 previously described (Hanafy and others 2017). Feces were suspended in rumen-fluid (RF)  
100 media (Calkins and others 2016; Hanafy and others 2018) with either cellobiose, or 0.5%  
101 cellobiose and switchgrass (0.5%) used as a substrate. Antibiotics (50 µg/mL kanamycin, 50  
102 µg/mL penicillin, 20 µg/mL streptomycin, and 50 µg/mL chloramphenicol, respectively) were

103 added to inhibit growth of bacteria. Samples were serially diluted and incubated at 39 C for 24–  
104 48 h. Dilutions showing visible signs of growth (clumping or floating plant materials and  
105 production of gas bubbles) were then used for the preparation of roll tubes (Hungate 1969) on  
106 RF-cellobiose agar media. Single colonies were picked into liquid RF-cellobiose media, and at  
107 least three rounds of tube rolling and colony picking were conducted to ensure purity of the  
108 obtained colonies. Strains were maintained by bi-weekly subculturing into RF-cellobiose media.  
109 In India, the fecal samples were homogenised in anaerobic diluent (McSweeney and others 2005)  
110 using BagMixer (Interscience, France). One ml of homogenate was inoculated into 9 ml fungal  
111 culture medium (Joshi and others 2018) containing neutral detergent fibre (NDF) as the sole  
112 carbon source, and serially diluted up to  $10^{-3}$  dilution. The antibiotics benzylpenicillin and  
113 streptomycin sulfate (final concentration 2 mg/ml) were used to inhibit the bacterial growth.  
114 Following incubation at  $39 \pm 1$  C for 5–10 d, the tubes showing visible colonization of NDF were  
115 used to isolate pure cultures of anaerobic fungi using serum roll bottle method as described  
116 previously (Joshi and others 2018). The colonies differing in morphology were picked, grown in  
117 liquid culture medium, and re-roll bottled until single culture was established.  
118 Long-term storage was conducted by surface inoculation of RF-cellobiose agar media as  
119 described previously (Calkins and others 2016), or by cryopreservation at  $-80$  °C using 0.64 M  
120 ethylene glycol as the cryoprotectant (Callaghan and others 2015). Cultures are available at  
121 Oklahoma State University, Department of Microbiology and Molecular Genetics culture  
122 collection, and at MACS Collection of Microorganisms (MCM), Agharkar Research Institute,  
123 Pune, India. In Wales, isolation procedures were conducted as previously described in  
124 (Callaghan and others 2015).

125 *Morphological characterization*— The colony morphology of 3d old cultures on roll bottles was  
126 measured using a stereomicroscope (Leica M205 FA) equipped with a digital camera (Leica  
127 DFC450 C), or directly from the roll tube. Samples for light and scanning electron microscopy  
128 were obtained from liquid cultures at various stages of growth. Lactophenol cotton blue stain  
129 was used for visualization of fungal structures using an Olympus BX51 microscope (Olympus,  
130 Center Valley, Pennsylvania) equipped with a DP71 digital camera (Olympus), or a phase  
131 contrast microscope equipped with a Canon DS126191 digital camera. For examination of nuclei  
132 localization, samples were stained with 4', 6 diamidino-2-phenylindole (DAPI, 10 µg/ml), as  
133 previously described (Callaghan and others 2015; Hanafy and others 2018; Joshi and others  
134 2018) and examined using a fluorescence Olympus BX51 microscope (Olympus, Center Valley,  
135 Pennsylvania) equipped with a Brightline DAPI high-contrast filter set for DAPI fluorescence  
136 and a DP71 digital camera (Olympus), or an Olympus BX53 differential interference contrast  
137 (DIC) microscope equipped with a DP73 digital camera (Olympus). Scanning electron  
138 microscopy was conducted with a FEI quanta scanning electron microscope (Hillsboro, Oregon,  
139 USA), or a Carl Zeiss EVO MA15 (Hanafy and others 2017; Joshi and others 2018).

140 *Phylogenetic analysis*— Biomass was harvested and crushed in liquid N<sub>2</sub>. DNA was extracted  
141 from the ground fungal biomass using DNeasy PowerPlant Pro Kit (Qiagen Corp., Germantown,  
142 MD, USA) according to the manufacturer's instructions, or using the CTAB DNA extraction  
143 protocol (Joshi and others 2018). To assess phylogenetic relationships, the ITS-1 region, and the  
144 D1/D2 region of the 28S rRNA (hereafter LSU) were amplified using the MN100 (5'-  
145 TCCTACCCCTTTGTGAATTTG-3') / MNGM2 (5'-CTGCGTTCTTCATCGTTGCG-3') pair,  
146 and the NL1 (5'-GCATATCAATAAGCGGAGGAAAAG-3') / NL4 (5'-  
147 GGTCCGTGTTTCAAGACG G-3') pair, respectively as previously described (Hanafy and



148 others 2017; Joshi and others 2018). The resulting PCR amplicon for the ITS-1 region was  
149 cloned into a TOPO-TA cloning vector according to the manufacturer's instructions (Life  
150 Technologies®, Carlsbad, CA) and several clones were Sanger sequenced, while the purified  
151 LSU PCR amplicons were directly sequenced using the services of the Oklahoma State  
152 University DNA core facility or a commercial provider (1<sup>st</sup> BASE, Singapore). The obtained  
153 sequences were aligned to anaerobic fungal reference ITS-1 and LSU sequences downloaded  
154 from GenBank using MAFFT aligner (Nakamura and others 2018) and the alignments were used  
155 to construct maximum likelihood phylogenetic trees in MEGA7 (Kumar and others 2016), using  
156 *Chytriomycetes* sp. JEL176 as the outgroup. Bootstrap values were calculated on the basis of 100  
157 replicates.

158 *Ecological distribution*— We queried GenBank and ITS-1 datasets (Kittelman and others 2012;  
159 Liggenstoffer and others 2010; Paul and others 2018) using reference ITS-1 sequences from  
160 strains recovered in this study. The phylogenetic position of all closely related sequences (> 87%  
161 sequence similarity) was evaluated by insertion into maximum likelihood trees. Taxonomy of  
162 uncultured taxa followed the schemes outlined in prior publications (Kittelman and others 2012;  
163 Liggenstoffer and others 2010; Paul and others 2018).

164 *Accession numbers*— Sequences generated in this study have been deposited in GenBank under  
165 accession numbers MK881965-MK882046, MK775304, MK775310-MK775313, MK775315,  
166 MK775321-MK775324, MK755326-MK755327, MK755330, MK755333. Alignments and  
167 phylogenetic trees are available through TreeBase under study accession URL  
168 <http://purl.org/phylo/treebase/phylows/study/TB2:S24394>

169 **RESULTS**

170 *Isolation summary*— Sixty-five different strains were obtained and characterized in this study  
171 (TABLE 1). These isolates were obtained from fecal samples of five wild undomesticated  
172 herbivores: Axis Deer (W-TX), White tailed Deer (W-OK), Mouflon (W-TX), Boer Goat (W-  
173 TX), and Nilgiri Tahr (Munnar, Kerala, India), one zoo-housed Grevy’s Zebra (Z-OK), two  
174 domesticated Horses (D-WA), two domesticated Goats (D-HA and D-KE) and a domesticated  
175 Sheep (D-HA) (TABLE 1). Morphological, microscopic and phylogenetic analysis described  
176 below grouped these isolates into seven distinct clades (Labeled clades 1-7 in TABLE 1  
177 according to alphabetical order of suggested genus names). Isolates representing three clades  
178 were obtained from one host animal only: White Tailed Deer strains (Clade 2), Axis Deer strains  
179 (Clade 4), and Nilgiri Tahr strains (clade 7); while isolates representing four clades were  
180 identified in more than sample: Mouflon-Boer Goat strains (clade 1), Boer Goat-domesticated  
181 Goat strains (clade 3), domesticated Sheep-Goat strains (clade 5), and Zebra-Horse strains (clade  
182 6). No specific morphological or microscopic decipherable differences were identified between  
183 different strains belonging to most of these clades, and one strain from each group was chosen  
184 for detailed analysis (TABLE 1). The only two exceptions were: 1. Strains belonging to clade 3  
185 (Boer Goat-domesticated Goat); where strains from wild Boer Goat (W-TX) displayed distinct  
186 microscopic and phylogenetic differences from those obtained from the domesticated Goat (D-  
187 KE) to warrant the detailed characterization and eventual description of two different strains  
188 (TABLE 1 and detailed descriptions below), and 2. Strains belonging to clade 6 (Zebra-Horse)  
189 where few microscopic, but negligible phylogenetic differences were observed between the 16  
190 Zebra strains (Z-OK) and the 5 Horse strains (D-WA) identified. These differences are  
191 highlighted below, but we do not believe they warrant the description of a new species, given the

192 negligible sequence divergences between these strains. Below, we provide a detailed  
193 characterization of these seven novel groups.

194 *Colony morphology and macroscopic growth characteristics*—Clade 1 (Mouflon-Boer Goat)  
195 strain MS-2 produced small brown circular colonies (0.2–1 mm diam.) on agar, and a thin  
196 biofilm-like growth in liquid media (FIG. 1a). Clade 2 (White tailed Deer) strain WT-2 produced  
197 beige circular colonies (0.5–2.5 mm diam.) with a brown central core of dense sporangial  
198 structures and an outer ring of light gray hyphal growth. In liquid media, it produced heavy  
199 growth of thick biofilms that firmly attached to the tube’s glass surface (FIG. 1b). Clade 3 (Boar  
200 Goat-domesticated Goat) strain BGB-11 produced small circular brown colonies (0.1–0.5 mm  
201 diam.), with dark center of sporangia structures and a thin fungal biofilm in liquid media (FIG.  
202 1c), while Boar Goat-domesticated Goat strain GFKJa1916 produced compact cottony off-white  
203 colonies of 2–3 mm size, with a fluffy center of thick sporangial structures and surrounded by  
204 radiating rhizoids (FIG. 1d). In liquid media, strain GFKJa1916 produced numerous fungal thalli  
205 attached to the glass bottles on initial days of growth, which later developed into thin mat-like  
206 structures. Clade 4 (Axis Deer) strain Axs-31 produced small circular white colonies (1–4 mm  
207 diameter), with a brown central core of dense sporangial structures on agar and a thick fungal  
208 biofilm-like growth in liquid media (FIG. 1e). Clade 5 (Domesticated Goat-Sheep) strain  
209 GFH683 produced 1–2 mm sized colonies, having a dense dark central core of abundant  
210 sporangial growth, surrounded by long and thin radiating rhizoids (FIG. 1g). In liquid media,  
211 strain GFH683 produced numerous fungal thalli attached to the glass bottles on initial days of  
212 growth, which later developed into thin mat-like structures. Clade 6 (Zebra-Horse) strains Zebra  
213 strain ZS-33 produced small yellow to yellowish brown irregularly shaped colonies (FIG. 1f). In  
214 liquid media, the fungal thalli were loose and exhibited a sand-like appearance resembling liquid

215 growth patterns generally observed with isolates belonging to the bulbous genera *Caecomyces*  
216 and *Cyllamyces* (personal observation) (FIG. 1f). Finally, clade 7 (Nilgiri Tahr) strain  
217 TDFKJa193 were smaller, approximately 1 mm in size, white in color with a compact and fluffy  
218 center, surrounded by dotted circles of fungal thalli. In liquid media, the strain produced  
219 numerous fungal thalli attached to the glass bottles on initial days of growth, which later  
220 developed into thin mat-like structures (FIG. 1h).

221

222 *Microscopic features—*

223 *Clade 1 (Mouflon-Boer Goat) strains—* Strain MS2 produced small globose zoospores, with an  
224 average diameter of  $4 \pm 1.1 \mu\text{m}$  (average  $\pm$  standard deviation values from 29 zoospores, range  
225  $2.7\text{--}7.5 \mu\text{m}$ ). Zoospores were mainly mono-flagellate with a flagellum length of  $22 \pm 3.8 \mu\text{m}$   
226 (average  $\pm$  standard deviation values for 29 zoospores, range  $16.6\text{--}30 \mu\text{m}$ ), approximately 5–6  
227 times longer than the zoospore body (FIG. 2a). Biflagellate zoospores (FIG. 2b) were rarely  
228 encountered. Zoospores germinated into monocentric thalli with filamentous anucleate rhizoidal  
229 systems (FIG. 2c-d). Both endogenous and exogenous sporangia were observed, which were  
230 very homogenous and displayed no pleomorphism. Endogenous sporangia were globose, with a  
231 diameter range of  $15\text{--}65 \mu\text{m}$  (FIG. 2e-f). The rhizoid was swollen below the sporangial neck,  
232 which was tightly constricted (FIG. 2e-f). Exogenous sporangia were also consistently globose  
233 and developed at the end of swollen sporangiophores ( $30\text{--}80 \mu\text{m L X } 5\text{--}10 \mu\text{m W}$ ) (FIG. 2g-h).  
234 The sporangial neck was constricted with a narrow neck port. Zoospores were released through  
235 dissolution and rupturing of the sporangial wall (FIG. 2i).

236 *Clade 2 (White-tailed Deer) strains—* Strain WT-2 produced globose zoospores, with an average  
237 diameter of  $7.4 \pm 2.4 \mu\text{m}$  (average  $\pm$  standard deviation values for 35 zoospores, range  $4.5\text{--}13$

238  $\mu\text{m}$ ). Zoospores were mostly monoflagellate, with an average flagellum length of  $22.8 \pm 6.3 \mu\text{m}$   
239 (average  $\pm$  standard deviation values for 35 zoospores, range 12–35  $\mu\text{m}$ ) (FIG. 3a). Zoospores  
240 with two (FIG. 3b) to three (FIG. 3c) flagella were less frequently observed. Fungal thalli were  
241 consistently monocentric with filamentous anucleate rhizoids (FIG. 3d). Germination of  
242 zoospores produced two types of monocentric thalli, endogenous and exogenous. Endogenous  
243 sporangia with single (FIG. 3e) and two adjacent rhizoidal systems (FIG. 3f) were observed.  
244 Occasionally, pseudo- intercalary endogenous sporangia (sporangia present in the middle of two  
245 main rhizoids) were encountered (FIG. 3g), Similar to what have previously been observed with  
246 the genera *Oontomyces* (Dagar and other, 2015) and *Feramyces* (Hanafy and others, 2017).  
247 Exogenous sporangia developed at the end of unbranched sporangiophores of varying length  
248 from a few microns to 230  $\mu\text{m}$  (FIG. 3h-j). No morphological differences were noticed between  
249 endogenous and exogenous sporangia and their shapes ranged from ovoid (FIG. 3e-f), globose  
250 (FIG. 3g-h), obpyriform (FIG. 3j-k and 3n-o), and ellipsoidal (FIG. 3i and 3l). Many, but not all,  
251 sporangia were papillated with one (FIG. 3m-p) or two (FIG. 3q) papillae. These papillated  
252 sporangia are similar to those previously observed in *Piromyces mae* (Li and others 1990). It is  
253 believed that these papillae disintegrate to facilitate zoospore release. However, we were unable  
254 to observe zoospore discharge through papillae in strain WT-2.

255 *Clade 3 (Boer Goat-domesticated Goat) strains*— Boer Goat Strain BGB-11 produced globose  
256 zoospores, with an average diameter of  $5.5 \pm 0.97 \mu\text{m}$  (average  $\pm$  standard deviation values for  
257 40 zoospores, range 4–7  $\mu\text{m}$ ). The majority of zoospores were mono-flagellate with a flagellum  
258 length of  $19.6 \pm 3.2 \mu\text{m}$  (average  $\pm$  standard deviation values for 40 zoospores, range 15–25  $\mu\text{m}$ ),  
259 (FIG. 4a). Occasionally, biflagellate zoospores were observed (FIG. 4b). Zoospores encystment  
260 followed flagellar shedding (FIG. 4c). Zoospore cyst germinated producing germ tube (FIG. 4d)

261 that subsequently branched (FIG. 4e) into monocentric thalli with filamentous anucleate  
262 rhizoidal systems (FIG. 4f-g).

263 The expansion of the zoospore cysts resulted in the formation of endogenous sporangia  
264 that were ellipsoidal (FIG. 4h) and ovoid (FIG. 4i). In addition to endogenous sporangia,  
265 exogenous sporangia were also observed at the end of unbranched sporangiophores ranging in  
266 length between 20–150  $\mu\text{m}$  (FIG. 4j-p). Some of the sporangiophores ended with sub-sporangial  
267 swellings (FIG. 4l-m). Exogenous sporangia varied in shape from ovoid (FIG. 4k-l), ellipsoidal  
268 with a single constriction (FIG. 4n), and globose (FIG. 4o-p). Zoospores were liberated through a  
269 wide apical pore at the top of the sporangia followed by sporangial wall collapse (FIG. 4m, q-r).

270 Domesticated Goat strain GFKJa1916 on the other hand produced globose zoospores  
271 (FIG. 5a), with an average diameter of 4–5  $\mu\text{m}$ . The majority of zoospores were mono-flagellate  
272 with a flagellum length of 15–20  $\mu\text{m}$ . Bi- and tri-flagellate zoospores were also observed. Strain  
273 GFKJa1916 zoospores germinated either endogenously or exogenously into a single monocentric  
274 thallus, which was also confirmed by the presence of nuclei only in sporangia and their absence  
275 in rhizoids (FIG. 5b-c). Endogenous sporangia varied in shape between cylindrical, elongate,  
276 globose, sub-globose, ellipsoid & obovoid with sizes ranging between 8–60  $\mu\text{m}$  wide & 10–140  
277  $\mu\text{m}$  long (FIG. 5d-g). Unlike Boer Goat Strain BGB-11, exogenous sporangia in the  
278 domesticated Goat strain GFKJa1916 developed at the end of long thick sporangiophores (up to  
279 300  $\mu\text{m}$  in some cases) (FIG. 5h-l), and multisporangiate thalli were commonly observed with  
280 two sporangia of either the same (FIG. 5j) or different (FIG. 5k-l) shape, similar to *Piromyces*  
281 *rhizinflatus* (Ho and Barr 1995) and *Neocallimastix frontalis* (Barr and others 1995).

282 *Clade 4 (Axis Deer) strains*— Strain Axs-31 produced globose zoospores, with an average  
283 diameter of  $8.1 \pm 1.3 \mu\text{m}$  (average  $\pm$  standard deviation values for 35 zoospores, range 6–10.5

284  $\mu\text{m}$ ). All zoospores were polyflagellate, with (7–14) flagella and an average flagellum length of  
285  $23.5 \pm 4.9 \mu\text{m}$  (average  $\pm$  standard deviation values for 35 zoospores, range 16–31  $\mu\text{m}$ ) (FIG.  
286 6a). Zoospores germinated into monocentric thalli with highly branched anucleate rhizoidal  
287 systems (FIG. 6b-c).

288 Strain Axs-31 exhibited both endogenous and exogenous monocentric thallus  
289 development. In endogenous thalli, zoospore cysts enlarged into new sporangia of different  
290 shapes, including globose (FIG. 6d), tubular (FIG. 6e), clavate (FIG. 6f) and ellipsoidal (FIG.  
291 6g). Endogenous sporangia displayed tightly constricted necks (point between sporangia and  
292 rhizoids) with narrow ports (arrows in FIG. 6d-g).

293 During exogenous thallus development, zoospore cysts germinated from both ends.  
294 Rhizoids developed on one side while sporangiophores developed on the opposite side. The  
295 empty zoospore cyst remained as a persistent swollen structure at the base of sporangiophore  
296 (FIG. 6h). Exogenous sporangia developed at the end of unbranched sporangiophores of varied  
297 lengths. Short sporangiophores had an average length of 6–20  $\mu\text{m}$  (FIG. 6h-i), while long  
298 sporangiophores extended up to 200  $\mu\text{m}$  (FIG. 6j). Some of the short sporangiophores had  
299 eggcup-shaped appearance (FIG. 6k). Exogenous sporangia were ellipsoidal (FIG. 6j), ovoid  
300 (FIG. 6k), globose (FIG. 6l), constricted ellipsoidal (FIG. 6m), pyriform (FIG. 6n), bowling pin-  
301 shaped (FIG. 6o), and rhomboidal (FIG. 6p). Sporangial necks were constricted with narrow port  
302 (FIG. 6m-p). At maturity, a fine septum developed at the base of the sporangium (FIG. 6n & p,  
303 arrow). Zoospores were released through an apical pore followed by collapse of the sporangial  
304 wall (FIG. 6q).

305

306 *Clade 5 (Domesticated Goat and Sheep) strains*— Strain GFH683 produced globose zoospores  
307 (FIG. 8a-b), with an average diameter of 5–6  $\mu\text{m}$ . The majority of zoospores were mono-  
308 flagellate with 1, or 2 flagella (FIG. 7a-b). Flagellum length ranged between 20–22  $\mu\text{m}$ .  
309 Zoospores germinated to produce both endogenous and exogenous monocentric thalli (FIG. 7c-  
310 f), as evident by presence of a single sporangium per thallus, nucleated sporangia but anucleate  
311 rhizoids. Endogenous sporangia were globose, sub-globose, ovoid, and obovoid (FIG. 7g) with  
312 sizes ranging between 8–40  $\mu\text{m}$  wide & 10–40  $\mu\text{m}$  long. Exogenous sporangia were terminal and  
313 varied in shape between globose, ovoid, and obovoid with sporangiophores that varied in length  
314 from 20–80  $\mu\text{m}$  (FIG. 7h-i). Zoospores discharge occurred through gradual dissolution of a wide  
315 apical portion of sporangial wall, resulting in formation of an empty cup-shaped sporangium  
316 (FIG. 7j-l). Such zoospore liberation patterns, and empty cup shaped sporangia were earlier  
317 documented for *Piromyces minutus* (Ho and Barr 1995).

318 *Clade 6 (Zebra-Horse) strains*— Strain ZS-33 produced spherical zoospores, with an average  
319 diameter of  $10.8 \pm 3 \mu\text{m}$  (average  $\pm$  standard deviation of 54 zoospores, range 6–17  $\mu\text{m}$ ). All  
320 zoospores were uniflagellate, with an average flagellum length of  $26 \pm 6.5 \mu\text{m}$  (average  $\pm$   
321 standard deviation of 54 zoospores, range 18–40  $\mu\text{m}$ ) (FIG. 8a). After shedding their flagella,  
322 zoospores started to encyst (FIG. 8b) and germinate producing germ tube (FIG. 8c). Germ tube  
323 branched and developed a highly branched anucleate rhizoidal system (FIG. 8d-e). Both narrow,  
324 0.5–2.5  $\mu\text{m}$  wide, and broad, 3–12.5  $\mu\text{m}$  wide, hyphae were observed; intercalary swellings were  
325 frequently encountered in the broad hyphae (arrow in FIG. 8f).

326 Both endogenous and exogenous sporangia were observed. Endogenous sporangia varied  
327 in shape and size. Small endogenous sporangia were mainly subglobose (20–60  $\mu\text{m}$  in diameter).  
328 (FIG. 8g). Large endogenous (80–160  $\mu\text{m}$  L X 35–65  $\mu\text{m}$  W) sporangia were mainly ellipsoidal



329 (FIG. 8h). Exogenous sporangia size ranged between (80–270 µm L X 35–85 µm W) and  
330 displayed a wider range of morphologies, e.g. heart-shaped (FIG. 8k), ovoid (FIG. 8l) and  
331 pyriform (FIG. 8m). Sporangiphores ranged in length between 20–400 µm. Characteristically,  
332 strain ZS-33 displayed a multisporengiate thallus: the majority of sporangiphores were  
333 branched and bore two to four sporangia (FIG. 8i-j). Similar sporangial morphology has  
334 previously been observed in members of the genus *Piromyces* (e.g. *P. rhizinflatus*), and  
335 *Caecomyces* (e.g. *C. communis*) (Akin and others 1988; Akin and others 1989; Breton and others  
336 1991). Unbranched sporangiphores with single sporangia were less frequently encountered  
337 (approximately 30% of observed sporangiphores n=50, Fig. 8k-m).

338 Zoospores were liberated through a wide apical pore at the top of the sporangia. The  
339 sporangial wall stayed intact after the discharge (FIG. 8n-p). Further, mature sporangia  
340 frequently detached from hyphae or sporangiphores, probably serving as an additional mean of  
341 fungal dispersal (FIG. 8q).

342 The type strain ZS-33 was obtained from Zebra fecal samples collected at the Oklahoma  
343 City Zoo. No noticeable differences were observed between ZS-33, and all other strains (n=15)  
344 obtained from Zebra fecal samples from the Oklahoma City Zoo. On the other hand, two distinct  
345 microscopic differences were identified in strains from domesticated Horses in Llanbadarn Fawr,  
346 Ceredigion County, Wales. First, multisporengiate thalli, copiously observed in ZS-33, were  
347 extremely rare in Welch Horse strains, and second, Distinct-resting stages (FIG. 8r) were often  
348 observed in Welch Horse strains, but never in Oklahoma City Zebra strains. Whether these  
349 differences are distinct characteristics of each group of strains, or induced by variations in media  
350 composition as well as growth and incubation procedures remain to be seen.

351 *Clade 7 (Nilgiri Tahr) strains*— Strain TDFKJa193 produced globose zoospores (FIG. 9a), with  
352 an average diameter of 3–4  $\mu\text{m}$ . The majority of zoospores were mono-flagellate with 1, 2, or 3  
353 flagella (FIG. 9a). Flagellum length ranged between 12–15  $\mu\text{m}$ . Strain TDFKJa193 exhibited  
354 both endogenous and exogenous monocentric thallus development (FIG. 9b-e). Endogenous  
355 sporangia were terminal, varied in shape between globose, ovoid & obovoid, and ranged in size  
356 between 10–70  $\mu\text{m}$  wide & 12–100  $\mu\text{m}$  long (FIG. 9f-g). Some endogenous sporangia showed  
357 sub-sporangial swellings (FIG. 9f). Endogenous sporangia with one or two main rhizoidal  
358 systems (FIG. 9f) and with branched rhizoidal system (FIG. 9g) were also observed. Exogenous  
359 sporangia, on the other hand, were globose, ovoid & obovoid and were observed at the end of  
360 short sporangiophores (12–20  $\mu\text{m}$ ) (FIG. 9h-k). Some of the sporangiophores ended with sub-  
361 sporangial swellings with (FIG. 9i-j) or without (FIG. 9h&k) constricted neck of 1–8  $\mu\text{m}$  width  
362 and 2–10  $\mu\text{m}$  length. The presence of subsporangial swellings and short sporangiophores were  
363 previously reported for *Piromyces mae* (Ho and Barr 1995) and *Buwchfawromyces eastonii*  
364 (Callaghan and others 2015). Mature exogenous sporangia often showed the formation of a  
365 septum at their base (FIG. 9k) similar to *Neocallimastix frontalis* (Ho and Barr 1995). Zoospores  
366 liberation happened after irregular dissolution of the sporangial wall (FIG. 9l).  
367  
368 *Phylogenetic analysis*— Phylogenetic analysis using LSU (FIG. 10a) placed the isolated strains into  
369 seven monophyletic and bootstrap-supported lineages that were distinct from all currently described  
370 AGF genera. LSU sequence divergence estimates between various strains within a single clade  
371 ranged between 0–1%. The closest cultured representative to each of the seven clades is shown in  
372 TABLE 1. Within the LSU taxonomic framework, strains recovered from Axis Deer clustered within  
373 the *Orpinomyces-Neocallimastix-Pecoramyces-Feramyces* suprageneric clade, while strains

374 recovered from Boer Goat and domesticated goat clustered within the *Oontomyces-Anaeromyces-*  
375 *Liebetanzomyces* supragenus clade. On the other hand, strains recovered from Nilgiri Tahr, as well as  
376 strains recovered from domesticated Goat and Sheep formed two distinct new clades associated with  
377 the genus *Buwchfawromyces*. In contrast, strains recovered from Zebra-Horse, and Mouflon-Boer  
378 Goat formed two distinct clades associated together but with no specific affiliation to any  
379 suprageneric group. The remaining group represented by strains isolated from White Tailed Deer  
380 displayed no specific affiliation to any currently characterized genera or supragenus groups within the  
381 Neocallimastigomycota.

382 To investigate ITS-1 sequence variability often reported within a single AGF strain, the ITS-1  
383 region was amplified, cloned, and sequenced from all type strains. ITS-1 sequence divergence  
384 within type strains ranged between 0% for strain TDFKJa193 representative of the Nilgiri Tahr  
385 strains clade, and 0–8.4% (average 3.4%) for strain MS-2 representative of the Mouflon-Boer  
386 Goat strains clade. ITS-1-based analysis confirmed the monophyletic and distinct nature of all  
387 seven lineages, but yielded a different topology (FIG. 10b), as consistently observed in prior  
388 studies (Hanafy and others 2017; Wang and others 2017). Of special note, was the surprisingly  
389 high ITS-1 sequence similarity of the Boer Goat-domesticated Goat clade represented by strains  
390 BGB-11 and GFKJa1916 (FIG. 10B), to an *Anaeromyces* sp. isolate GA-04 (GenBank accession  
391 number FJ912851.1, unpublished) and to *Anaeromyces robustus* (GenBank accession number  
392 NR\_148182.1 (Li and others 2016)). Average ITS-1 sequence divergence between various  
393 clones of the Boer Goat-domesticated Goat clade and *Anaeromyces* sp. GA-04 was 1.2%, and  
394 between various clones of the Boer Goat-domesticated Goat clade and *A. robustus* and was  
395 4.2%. Unfortunately, the LSU sequence data from both *Anaeromyces* sp. GA-04 and *A. robustus*  
396 are not available for further comparison. This may be attributed to the inaccurate identification

397 and reporting of these two cultures, an issue very well known in the anaerobic fungal taxonomy  
398 using ITS-1. We noted that in the paper describing *Anaeromyces robustus*, the type strain seems  
399 to deviate from the typical morphology of the genus *Anaeromyces*, e.g. multi-flagellate  
400 zoospores, lack of sausage shaped hyphae, and whale-tail like sporangia (see Figure 148 in (Li  
401 and others 2016)), casting doubts on the phylogenetic affiliation of *Anaeromyces robustus* to the  
402 genus *Anaeromyces*. Regardless, that stark morphological differences exist between Boer Goat-  
403 domesticated Goat strains and all other members of the genus *Anaeromyces*, e.g. monocentric  
404 thalli as opposed to polycentric thalli, absence of hyphal constrictions as opposed to sausage-  
405 shaped hyphae with multiple constrictions, and monoflagellate (2–4 flagella) versus uniflagellate  
406 zoospores (TABLE 1, FIG. 4-5). Such differences, in addition to the high ITS-1 sequence  
407 divergence values between the Boer Goat-domesticated Goat clade and other members of the  
408 genus *Anaeromyces* (7.1–13.1% to *A. mucronatus* and 8.5–18.6% to *A. contortus*), strongly  
409 support the distinction between these strains and the genus *Anaeromyces*.

410 *Ecological distribution*— We queried the GenBank nr database to determine whether  
411 representatives of these seven novel clades were encountered in prior ITS-1-based culture-  
412 independent AGF diversity surveys. Multiple sequences with high (95.3-100%) sequence  
413 similarity to Zebra-Horse strain ZS-33 ITS-1 sequence were identified. These sequences were  
414 recovered from fecal samples obtained from multiple animals housed in the Oklahoma City Zoo  
415 (Liggenstoffer and others 2010), as well as in various locations (left and right dorsal colon,  
416 caecum and right ventral colon) within the digestive tract of horses (Mura and others 2019). This  
417 group has previously been assigned the alphanumeric designation (AL1) (Kittelman and others  
418 2012; Liggenstoffer and others 2010).

419 Surprisingly, ITS-1 sequences from the remaining six lineages (Axis Deer, White-Tailed

420 Deer, Mouflon-Boer Goat, Boer Goat-domesticated Goat, domesticated Goat-domesticated Sheep,  
421 and Nilgiri Tahr) bore no close resemblance to all currently available ITS-1 sequence data (TABLE  
422 1), with highest similarity being 83% in White-Tailed Deer to sequences from Bontebok, 84% in  
423 Mouflon-Boer Goat to sequences from Bontebok, 88% in domesticated goat-domesticated sheep to  
424 sequences from horse, 89% in Nilgiri Tahr strains to sequences from Okapi, 91% in Axis Deer to  
425 sequences from Llama, and 91-92% in Boer Goat-domesticated Goat strains to sequences from cow.  
426 As such, representatives of these novel lineages, the absolute majority of which (5/6) recovered from  
427 fecal samples of wild non-domesticated herbivores, do not appear to correspond to any of the  
428 alphanumerically designated uncultured groups previously identified in prior culture-independent  
429 efforts.

#### 430 **TAXONOMY**

431 *Agriosomyces* Hanafy, Vikram B. Lanjekar, Prashant K. Dhakephalkar, T.M. Callaghan, Dagar,  
432 G.W. Griff, Elshahed, and N.H. Youssef, gen. nov.

433 MycoBank ID: MB830737

434 *Typification.* *Agriosomyces longus*. Hanafy, Vikram B. Lanjekar, Prashant K. Dhakephalkar,  
435 T.M. Callaghan, Dagar, G.W. Griff, Elshahed, and N.H. Youssef,

436 *Etymology:* *Agrioso*= derived from the Greek word for wild; *myces* = the Greek name for fungus.

437 Obligate anaerobic fungus that produces small spherical monoflagellate zoospores with an  
438 extremely long flagellum ( $22 \pm 3.8 \mu\text{m}$ ). Zoospores germinate into monocentric thalli with  
439 filamentous anucleate rhizoidal systems. Both endogenous and exogenous globose sporangia are  
440 observed, which are very homogenous and display no pleomorphism. Rhizoids are swollen  
441 below the sporangial neck, which is tightly constricted. Zoospores are released through

442 dissolution and rupturing of the sporangial wall. The clade is defined by the sequences  
443 MK882010-MK882013 (ITS-1) and MK881996 (D1-D2 28S rDNA).

444 *Agriosomyces longus* Hanafy, Vikram B. Lanjekar, Prashant K. Dhakephalkar, T.M. Callaghan,  
445 Dagar, G.W. Griff, Elshahed, and N.H. Youssef, sp. nov.  
446 MycoBank ID: MB830738.

447 *Typification*: The holotype is FIG. 2g in this manuscript, derived from the following: U.S.A.  
448 TEXAS: Val verde county, 29.369' N and 100.829' W ~300 m ASL, 3d old culture of isolate  
449 MS-2, originally isolated from freshly deposited feces of male Mouflon Sheep (*Ovis orientalis*),  
450 April 2018, *Radwa Hanafy*. Ex-type strain: MS2, GenBank: MK881996 (D1-D2 28S rDNA).

451 *Etymology*: The species epithet “*longus*” refers to the extremely long flagellum observed in  
452 zoospores of strain MS-2 (FIG. 2a).

453 Obligate anaerobic fungus that produces small globose monoflagellate zoospores with an  
454 average diameter of  $4 \pm 1.1 \mu\text{m}$ . Zoospores are mainly mono-flagellate with a flagellum length  
455 of  $22 \pm 3.8 \mu\text{m}$ , approximately 5-6 times longer than the zoospore body. Bi-flagellate zoospores  
456 are rarely encountered. Zoospores germinate into monocentric thalli with filamentous anucleate  
457 rhizoidal systems. Both endogenous and exogenous sporangia are observed, which display no  
458 pleomorphism and both show globose morphology. In endogenous sporangia, the rhizoids are  
459 swollen below the sporangial neck, which is tightly constricted. Exogenous sporangia develop at  
460 the end of swollen sporangiophores, and the sporangial neck is constricted with a narrow neck  
461 port. Zoospores are released through dissolution and rupturing of the sporangial wall. Produces  
462 small brown spherical colonies on agar, and a thin biofilm-like growth in liquid media. The clade  
463 is defined by the sequences MK882010-MK882013 (ITS-1) and MK881996 (D1-D2 28S  
464 rDNA).

465 *Additional specimens examined:* Radwa Hanafy strain MS-4 (GenBank accession number of D1-  
466 D2 28S rDNA amplicon MK881997) isolated from the same freshly deposited feces of male  
467 Mouflon Sheep (*Ovis orientalis*) from which the type strain originated, April 2018, and strain  
468 BGS-13 (GenBank accession number of D1-D2 28S rDNA amplicon MK881995) isolated from  
469 freshly deposited feces of female wild Boer Goat (*Capra aegagrus*), April, 2018.

470 ***Aklioshbomyces*** Hanafy, Vikram B. Lanjekar, Prashant K. Dhakephalkar, T.M. Callaghan,  
471 Dagar, G.W. Griff, Elshahed, and N.H. Youssef, gen. nov.  
472 MycoBank ID: MB830735

473 *Typification:* *Aklioshbomyces papillarum* Hanafy, Vikram B. Lanjekar, Prashant K.  
474 Dhakephalkar, T.M. Callaghan, Dagar, G.W. Griff, Elshahed, and N.H. Youssef.

475 *Etymology:* *Aklioshb*= derived from the Arabic word for grass-eaters (herbivores); *myces* = the  
476 Greek name for fungus.

477 Obligate anaerobic fungus that produces globose monoflagellate zoospores. Zoospores germinate  
478 into monocentric thalli with filamentous anucleate rhizoids. Exhibits both endogenous and  
479 exogenous monocentric thallus development. Exogenous sporangia develop at the end of  
480 unbranched sporangiophores of varying length. No morphological differences are observed  
481 between endogenous and exogenous sporangia, with ovoid, globose, and obpyriform sporangial  
482 shapes noted. The clade is defined by the sequences MK882038-MK882042 (ITS-1) and  
483 MK882001 (D1-D2 28S rDNA).

484 ***Aklioshbomyces papillarum*** Hanafy, Vikram B. Lanjekar, Prashant K. Dhakephalkar, T.M.  
485 Callaghan, Dagar, G.W. Griff, Elshahed, and N.H. Youssef, sp. nov.  
486 MycoBank ID: MB830736

487 *Typification:* The holotype is FIG. 3m in this manuscript, derived from the following: U.S.A.

488 OKLAHOMA: Payne county, 36.145' N and 97.007' W ~300 m ASL, 3d old culture of isolate  
489 WT-2, originally isolated from freshly deposited feces of female White-Tailed Deer (*Odocoileus*  
490 *virginianus*), October 2017, *Radwa Hanafy*. Ex-type strain: WT-2, GenBank: MK882001 (D1-  
491 D2 28S rDNA).

492 *Etymology*: The species epithet “*papillarum*” refers to the papillae observed on the majority of  
493 strain WT-2 sporangia (FIG. 3m-q).

494 Obligate anaerobic fungus that produces globose monoflagellate zoospores with an average  
495 diameter of  $7.4 \pm 2.4 \mu\text{m}$ . The majority of zoospores are monoflagellate, with zoospores with two  
496 to three flagella less frequently observed. Fungal thalli are consistently monocentric with  
497 filamentous anucleate rhizoids. Germination of zoospores produces two types of monocentric  
498 thalli, endogenous and exogenous. Endogenous sporangia with single and two adjacent rhizoidal  
499 systems are observed. Pseudo-intercalary endogenous sporangia are occasionally observed.

500 Sporangiphores carrying exogenous sporangia exhibit varying length from a few microns to 230  
501  $\mu\text{m}$ . Endogenous and exogenous sporangia are ovoid, globose, obpyriform, and ellipsoidal.  
502 Sporangia are mostly papillated with one or two papillae. Produces beige circular colonies with a  
503 brown central core of dense sporangial structures and an outer ring of light gray hyphal growth  
504 on agar, and heavy growth of thick biofilms that firmly attached to the tube’s glass surface in  
505 liquid media. The clade is defined by the sequences MK882038-MK882042 (ITS-1) and  
506 MK882001 (D1-D2 28S rDNA).

507 *Additional specimens examined*: *Radwa Hanafy* strains WT-1 (MK882000), WT-3 (MK881998),  
508 WT-4 (MK881999), WT-41(MK882002), WTS-51 (MK882006), WTS-52 (MK882003), WTS-  
509 53 (MK882004), and WTS-54 (MK882005), (GenBank accession number of D1-D2 28S rDNA  
510 amplicon in parenthesis) isolated from the same freshly deposited feces of female White-Tailed



511 Deer from which the type strain originated, October 2017.

512 *Capellomyces* Hanafy, Vikram B. Lanjekar, Prashant K. Dhakephalkar, T.M. Callaghan, Dagar,

513 G.W. Griff, Elshahed, and N.H. Youssef, gen. nov.

514 MycoBank ID: MB830739.

515 *Typification. Capellomyces foraminis.* Hanafy, Vikram B. Lanjekar, Prashant K. Dhakephalkar,

516 T.M. Callaghan, Dagar, G.W. Griff, Elshahed, and N.H. Youssef.

517 *Etymology: Capella*= derived from the Latin word for Goat; *myces* = the Greek name for fungus.

518 Obligate anaerobic fungus that produces monoflagellate (1–3 flagella) zoospores. Zoospores

519 germinate into monocentric thalli with filamentous anucleate rhizoidal systems. Both

520 endogenous and exogenous sporangia are observed, with varying shapes and sizes. The clade is

521 defined by the sequences MK882007-MK882009 (ITS-1), and MK881975 (D1-D2 28S rDNA).

522 *Capellomyces foraminis* Hanafy, Vikram B. Lanjekar, Prashant K. Dhakephalkar, T.M.

523 Callaghan, Dagar, G.W. Griff, Elshahed, and N.H. Youssef, sp. nov.

524 MycoBank ID: MB830740

525 *Typification:* The holotype is FIG. 4n in this manuscript, derived from the following: U.S.A.

526 U.S.A. TEXAS: Val verde county, 29.369' N and 100.829' W ~300 m ASL, 3d old culture of

527 isolate BGB-11, originally isolated from freshly deposited feces of a female Boer Goat (*Capra*

528 *aegagrus*) April 2018, *Radwa Hanafy*. Ex-type strain: BGB-11, GenBank: MK881975 (D1-D2

529 28S rDNA).

530 *Etymology:* The species epithet “*foraminis*” refers to the wide apical pore at the top of the

531 sporangia through which zoospores are discharged.

532 Obligate anaerobic fungus that produces spherical monoflagellate zoospores. Zoospores start to

533 encyst after shedding their flagella. Zoospore cyst germinates, producing germ tube that

534 subsequently branches into monocentric thalli with filamentous anucleate rhizoidal systems.  
535 Endogenous and exogenous sporangia are produced. Endogenous sporangia are ellipsoidal or  
536 ovoid. Exogenous sporangia are formed at the end of un-branched sporangiophores (20–150  
537  $\mu\text{m}$ ). Some of the sporangiophores exhibit sub-sporangial swellings. Exogenous sporangia are  
538 ovoid, ellipsoidal with a single constriction, and globose. Zoospores are liberated through a wide  
539 apical pore at the top of the sporangia followed by sporangial wall collapse. Colonies are small  
540 (0.1–0.5 mm diameter) circular and brown, with dark center of sporangia structures on agar.  
541 Produces thin fungal biofilm in liquid media. The clade is defined by the sequences MK882007-  
542 MK882009 (ITS-1), and MK881975 (D1-D2 28S rDNA).  
543 *Additional species examined.* Radwa Hanafy, strains BGB-2 (MK881974), BGC-12  
544 (MK881976), BGS-11 (MK881977), and BGS-12 (MK881978) isolated from the same freshly  
545 deposited feces of a female Boer Goat (*Capra aegagrus*), April 2018, from which the type strain  
546 originated, April 2018 (D1-D2 28S rDNA amplicon GenBank accession number in parenthesis).  
547 ***Capellomyces elongatus.*** Hanafy, Vikram B. Lanjekar, Prashant K. Dhakephalkar, T.M.  
548 Callaghan, Dagar, G.W. Griff, Elshahed, and N.H. Youssef.  
549 MycoBank: MB830869.  
550 *Typification:* The holotype is FIG. 5k in this manuscript, derived from the following: India,  
551 KERALA, town of Munnar, 10.219' N and 77.106' E ~2100 m ASL, 3d old culture of isolate  
552 GFKJa1916, originally isolated from freshly deposited feces of a domesticated but forest grazing  
553 Goat (*Capra aegagrus*), Sumit S. Daggar. Ex-type strain: GFKJa1916, GenBank: ITS-1  
554 (MK775315), D1-D2 28S rDNA (MK775304).  
555 *Etymology:* The species epithet “*elongatus*” refers to the characteristic long sporangiophore of  
556 exogenous sporangia. □

557 Obligate anaerobic fungus that produces globose monoflagellate (1, 2, or 3 flagella) zoospores.  
558 Zoospore cyst germinate both endogenously and exogenously to produce monocentric thalli with  
559 filamentous anucleate rhizoidal systems. Endogenous sporangia are cylindrical, elongate,  
560 globose, sub-globose, ellipsoid & obovoid with sizes ranging between 8–60 µm wide & 10–140  
561 µm long. Exogenous sporangia are formed at the end of developed at the end of long thick  
562 sporangiophores (up to 300 µm). Multisporangiate thalli are commonly observed with two  
563 sporangia of either the same or different shapes. Colonies are compact of 2–3 mm size, cottony  
564 and off-white in color with a compact and fluffy center made up of thick sporangia type  
565 structures, and surrounded by radiating rhizoids. Produces numerous fungal thalli that attach to  
566 the glass bottles on initial days of growth, which later develop into thin mat-like structures in  
567 liquid media. The clade is defined by the sequence MK775304 (D1-D2 28S rDNA).

568 *Additional species examined.* None

569 ***Ghazallomyces*** Hanafy, Vikram B. Lanjekar, Prashant K. Dhakephalkar, T.M. Callaghan, Dagar,  
570 G.W. Griff, Elshahed, and N.H. Youssef, gen. nov.

571 MycoBank ID: MB830733

572 *Typification:* *Ghazallomyces constrictus* Hanafy, Vikram B. Lanjekar, Prashant K.

573 Dhakephalkar, T.M. Callaghan, Dagar, G.W. Griff, Elshahed, and N.H. Youssef.

574 *Etymology:* *Ghazallo* = derived from the Arabic word for Deer (Ghazalla); *myces* = the Greek  
575 name for fungus.

576 Obligate anaerobic fungus that produces polyflagellate zoospores. Zoospores germinate into  
577 monocentric thalli with highly branched anucleate rhizoidal systems. Exhibits both endogenous  
578 and exogenous monocentric thallus development. Sporangia produced from endogenous and  
579 exogenous thalli development are pleomorphic, exhibiting a wide range of sporangial shapes.

580 During exogenous thallus development, zoospore cysts germinate from both ends, with rhizoids  
581 developing from one side and sporangiophore developing from the opposite side. The empty  
582 zoospore cyst remains as a persistent swollen structure at the base of unbranched sporangiophore  
583 that exhibit wide variations in lengths. Zoospores are released through an apical pore followed  
584 by collapse of the sporangial wall. The clade is defined by the sequences MK882043 (ITS-1) and  
585 MK881971 (D1-D2 28S rDNA).

586 ***Ghazallomyces constrictus*** Hanafy, Vikram B. Lanjekar, Prashant K. Dhakephalkar, T.M.  
587 Callaghan, Dagar, G.W. Griff, Elshahed, and N.H. Youssef, sp. nov.

588 MycoBank ID: MB830734

589 *Typification*: The holotype is FIG. 6h in this manuscript, derived from the following: U.S.A.  
590 TEXAS: Sutton county, 30.591' N and 100.138' W ~300 m ASL, 3d old culture of isolate Axs-  
591 31, originally isolated from freshly deposited feces content of female Axis Deer (*Axis axis*), Apr.  
592 2018, *Radwa Hanafy*. Ex-type strain: Axs-31, GenBank: MK881971 (D1-D2 28S rDNA).

593 *Etymology*: The species epithet “*constrictus*” refers to the observed constricted necks (point  
594 between sporangia and rhizoids) in the species endogenous sporangia (FIG. 6d-g).

595 Obligate anaerobic fungus that produces globose polyflagellate zoospores with 7–14 flagella.

596 Zoospores germinate into monocentric thalli with highly branched anucleate rhizoidal systems.

597 Exhibits both endogenous and exogenous monocentric thallus development. Endogenous

598 sporangia produced from zoospore cyst enlargement develop into different shapes including

599 globose, tubular, clavate, and ellipsoidal. Endogenous sporangia display tightly constricted necks

600 (point between sporangia and rhizoids) with narrow ports. Exogenous sporangia develop at the

601 end of unbranched sporangiophores of varied lengths. Both short (6–20µm) and long (up to

602 200µm) sporangiophores are observed. The exogenous sporangia display ellipsoidal, ovoid,

603 globose, constricted ellipsoidal, pyriform, bowling pin-like, and rhomboidal shapes. Sporangial  
604 necks are constricted with narrow port. A fine septum develops at the base of the sporangium at  
605 maturity. Zoospores are released through an apical pore followed by collapse of the sporangial  
606 wall. Produces small circular white colonies (1–4 mm diameter) with a brown central core of  
607 dense sporangial structures on agar, and a thick fungal biofilm growth in liquid media. The clade  
608 is defined by the sequences MK882043 (ITS-1) and MK881971 (D1-D2 28S rDNA).

609 *Additional specimens examined:* Radwa Hanafy strains ADC-2 (MK881965), ADS-14  
610 (MK881966), AXS-33 (MK881967), AXS-34 (MK1881968), ADS-12 (MK881969), AXS-32  
611 (MK881970), ADS-11 (MK881972), and ADS-21 (MK881973) (GenBank accession number of  
612 D1-D2 28S rDNA amplicon in parenthesis) isolated from the same freshly deposited feces of  
613 female Axis Deer (*Axis axis*) from which the type strain originated, April 2018.

614 ***Joblinomyces*** Hanafy, Vikram B. Lanjekar, Prashant K. Dhakephalkar, T.M. Callaghan, Dagar,  
615 G.W. Griff, Elshahed, and N.H. Youssef, gen. nov.

616 MycoBank ID: MB830867

617 *Typification.* *Joblinomyces apicalis*. Hanafy, Vikram B. Lanjekar, Prashant K. Dhakephalkar,  
618 T.M. Callaghan, Dagar, G.W. Griff, Elshahed, and N.H. Youssef.

619 *Etymology:* *Joblino*= honoring Keith N. Joblin for his contributions to the field of anaerobic  
620 fungi; *myces* = the Greek name for fungus.

621 Obligate anaerobic fungus that produces globose monoflagellate zoospores. Both endogenous  
622 and exogenous sporangia are observed with varying shapes and sizes. Sporangiohores of  
623 exogenous sporangia vary in length. Exogenous sporangia have short and frequently swollen  
624 sporangiohores. Zoospores discharge occurs through gradual dissolution of a wide apical

625 portion of sporangial wall, resulting in formation of an empty cup-shaped sporangium. The clade  
626 is defined by the sequences MK910278 (ITS-1) and MK910268 (D1-D2 28S rDNA).

627 ***Joblinomyces apicalis***. Hanafy, Vikram B. Lanjekar, Prashant K. Dhakephalkar, T.M.  
628 Callaghan, Dagar, G.W. Griff, Elshahed, and N.H. Youssef.  
629 MycoBank ID: MB830868

630 *Typification*: The holotype is FIG. 7c in this manuscript, derived from the following: India,  
631 HARYANA, city of Sonipat, 28.988' N and 76.941' E ~220 m ASL, 3d old culture of isolate  
632 GFH683, originally isolated from freshly deposited feces of a domesticated goat (*Capra*  
633 *aegagrus hircus*), *Sumit Dagar*. Ex-type strain: GFH683, GenBank: MK910268 (D1-D2 28S  
634 rRNA).

635 *Etymology*: The species epithet “*apicalis*” refers to the zoospore discharge through the  
636 dissolution of a wide apical portion of the sporangial wall.

637 Obligate anaerobic fungus that produces globose monoflagellate zoospores with 1, or 2 flagella.  
638 Zoospores germinate to produce both endogenous and exogenous monocentric thalli.

639 Endogenous sporangia vary in shape between globose, sub-globose, ovoid, and obovoid with  
640 sizes ranging between 8–40 µm wide & 10–40 µm long. Exogenous sporangia are terminal and  
641 vary in shape between globose, ovoid, obovoid. Sporangiphores vary in length from 20–80 µm.  
642 Zoospores discharge occur through gradual dissolution of a wide apical portion of sporangial  
643 wall, resulting in formation of an empty cup-shaped sporangium. Produces 1–2 mm sized  
644 colonies with a dense dark central core of abundant sporangial growth, surrounded by long and  
645 thin radiating rhizoids. In liquid media, it produces numerous fungal thalli that attach to the glass  
646 bottles on initial days of growth, and later develop into thin mat-like structures. The clade is

647 defined by the sequences MK910278-MK910282 (ITS-1) and MK910268-MK910272 (D1-D2  
648 28S rDNA).

649 *Additional specimens examined:* Sumit Dagar strains GFH681 (MK910263-MK910267) and GFH682  
650 (MK775330) (GenBank accession number of D1-D2 28S rDNA amplicon in parenthesis) isolated  
651 from the same freshly deposited domesticated goat feces from which the type strain originated, and  
652 SFH683 (MK775333) isolated from freshly deposited domesticated sheep feces in the city of Sonipat,  
653 Haryana, India.

654 *Khoyollomyces* Hanafy, Vikram B. Lanjekar, Prashant K. Dhakephalkar, T.M. Callaghan, Dagar,  
655 G.W. Griff, Elshahed, and N.H. Youssef, gen. nov.  
656 MycoBank ID: MB830741

657 *Typification.* *Khoyollomyces ramosus*. Hanafy, Vikram B. Lanjekar, Prashant K. Dhakephalkar,  
658 T.M. Callaghan, Dagar, G.W. Griff, Elshahed, and N.H. Youssef.

659 *Etymology:* *Khyollo*= derived from the Arabic word for horses; *myces* = the Greek name for  
660 fungus.

661 Obligate anaerobic fungus that produces spherical uniflagellate zoospores. Zoospores encyst and  
662 develop a highly branched anucleate rhizoidal system. Both endogenous and exogenous  
663 sporangia are observed. Small endogenous sporangia are subglobose and large endogenous  
664 sporangia are ellipsoidal. Exogenous sporangia displayed a wider range of shapes. The majority  
665 of sporangiophores are branched and bear two to four sporangia. Unbranched sporangiophores  
666 bearing a single sporangium are less frequently encountered. Zoospores are liberated through a  
667 wide apical pore at the top of the sporangia. Mainly found in the digestive tracts of equids. The  
668 clade is defined by the sequences MK882019 (ITS-1), and MK881981 (D1-D2 28S rDNA).

669 ***Khoyollomyces ramosus***. Hanafy, Vikram B. Lanjekar, Prashant K. Dhakephalkar, T.M.  
670 Callaghan, Dagar, G.W. Griff, Elshahed, and N.H. Youssef, sp. nov.  
671 MycoBank ID: MB830742.  
672 *Typification*: The holotype is FIG. 8j in this manuscript, derived from the following: U.S.A.  
673 OKLAHOMA: Oklahoma City, 35.524' N and 97.472' W ~300 m ASL, 3d old culture of isolate  
674 ZS-33, originally isolated from freshly deposited feces of a Grevy's Zebra (*Equus grevyi*), May,  
675 2018, *Radwa Hanafy*. Ex-type strain: ZS-33, GenBank: MK881981 (D1-D2 28S rDNA).  
676 *Etymology*: The species epithet "*ramosus*" (Latin for branched) refers to the observed branched  
677 sporangiophores bearing two to four sporangia in *K. ramosus* type strain ZS-33 (FIG. 8i-k).  
678 Obligate anaerobic fungus that produces spherical uniflagellate zoospores. Zoospores encyst and  
679 germinate producing germ tube that develops into a highly branched anucleate rhizoidal system.  
680 Both narrow, 0.5–2.5µm wide, and broad hyphae, 3–12.5µm wide, are produced; intercalary  
681 swellings are frequently encountered in the broad hyphae. Both endogenous and exogenous  
682 sporangia were observed. Endogenous sporangia vary in shape and size, with small endogenous  
683 sporangia mainly subglobose (20–60 µm in diameter) while large endogenous (80–160µm L X  
684 35–65µm W) sporangia mainly ellipsoidal. Exogenous sporangia ranged in size between (80–  
685 270µm L X 35–85µm W)) and display a wide range of morphologies, e.g. heart-shaped, ovoid,  
686 and pyriform. Displays a multisporengiate thallus, with the majority of sporangiophores being  
687 branched and bearing two to four sporangia. Unbranched sporangiophores with single sporangia  
688 are less frequently encountered (approximately 30% of observed sporangiophores). Zoospores  
689 are liberated through a wide apical pore at the top of the sporangia. The sporangia stay intact  
690 after the discharge. Mature sporangia frequently detach from hyphae or sporangiophores.  
691 Produces small yellow to yellowish brown irregularly shaped colonies on agar. In liquid media,



692 the fungal growth is loose and exhibited a sand-like appearance. The clade is defined by the  
693 sequences MK882019 (ITS-1), and MK881981 (D1-D2 28S rDNA).

694 *Additional specimens examined:* Radwa Hanafy strains ZC-31 (MK881979), ZC-32  
695 (MK881980), ZC-33 (MK881981), ZC-41 (MK881982), ZC-42 (MK881983), ZC-43  
696 (MK881984), ZC-51 (MK881985), ZC-53 (MK881986), ZS-21 (MK881987), ZS-22  
697 (MK881988), ZS-31 (MK881989), ZS-32 (MK881990), ZS-41 (MK881992), ZS-42  
698 (MK881993), and ZS-43 (MK881994) (GenBank accession number of D1-D2 28S rDNA  
699 amplicon in parenthesis) isolated from the same freshly deposited Zebra feces from which the  
700 type strain originated, May 2018. Tony Callaghan strains: HoCal4.A2, HoCal4.A2.2, HoCal4.A4  
701 isolated from fresh horse feces (Llanbadarn, nr. Aberystwyth; 52.4156,-3.8878), August 2013.  
702 Two further cultures (Tmc003.6a, TMC3.6b) were isolated from a different horse at the same  
703 site, November 2013.

704 ***Tahromyces*** Hanafy, Vikram B. Lanjekar, Prashant K. Dhakephalkar, T.M. Callaghan, Dagar,  
705 G.W. Griff, Elshahed, and N.H. Youssef, gen. nov.

706 MycoBank ID: MB830865

707 *Typification.* *Tahromyces munnarensis.* Hanafy, Vikram B. Lanjekar, Prashant K.  
708 Dhakephalkar, T.M. Callaghan, Dagar, G.W. Griff, Elshahed, and N.H. Youssef.

709 *Etymology:* *Tahro*= referring to the Nilgiri Tahr from which the species was isolated; *myces* =  
710 the Greek name for fungus.

711 Obligate anaerobic fungus that produces globose monoflagellate zoospores. Both endogenous  
712 and exogenous sporangia are observed with varying shapes and sizes. Endogenous sporangia  
713 with one or two main rhizoidal systems and with branched rhizoidal system are frequently  
714 observed. Exogenous sporangia have short and frequently swollen sporangiophores. Sporangial

715 necks are frequently constricted. Septa often form at the base of mature exogenous sporangia.  
716 Zoospores liberation happens after irregular dissolution of the sporangial wall. The clade is  
717 defined by the sequences MK775321 (ITS-1), and MK775310 (D1-D2 28S rDNA).  
718 ***Tahromyces munnarensis*** Hanafy, Vikram B. Lanjekar, Prashant K. Dhakephalkar, T.M.  
719 Callaghan, Dagar, G.W. Griff, Elshahed, and N.H. Youssef.  
720 MycoBank ID: MB830866  
721 *Typification:* The holotype is FIG. 9h in this manuscript, derived from the following: India,  
722 KERALA, town of Munnar, 10.219' N and 77.106' E ~2100 m ASL, 3d old culture of isolate  
723 TDFKJa193, originally isolated from freshly deposited feces of a Nilgiri Tahr (*Nilgiritragus*  
724 *hylocrius*), *Sumit Dagar*. Ex-type strain: TDFKJa193, GenBank: ITS-1 accession number  
725 (MK775321), D1-D2 28S rDNA (MK775310).  
726 *Etymology:* The species epithet “*munna*” refers to the town that the type species was  
727 isolated from.  
728 Obligate anaerobic fungus that produces globose monoflagellate zoospores with 1, 2, or 3  
729 flagella. Both endogenous and exogenous sporangia were observed. The sporangia vary in size  
730 between 12–100 µm in length and 10–70 µm in width, and display a wide range of morphologies  
731 like globose, ovoid, and obovoid. Sporangiphores are short (12–20 µm) with frequent  
732 subsporangial swellings. Sporangial necks (1–8 µm width and 2–10 µm length) are frequently  
733 constricted. Septa often form at the base of mature exogenous sporangia. Zoospores liberation  
734 happens after irregular dissolution of the sporangial wall. Produces colonies that are small (1  
735 mm), white in color with a compact and fluffy center, surrounded by dotted circles of fungal  
736 thalli. In liquid media, it produces numerous fungal thalli attaching to the glass bottles on initial

737 days of growth, and later developing into thin mat-like structures. The clade is defined by the  
738 sequence MK775310 (D1-D2 28S rDNA).

739 *Additional specimens examined:* Sumit Dagar strains TDFKJa1924 (MK775323), TDFKJa1926  
740 (MK775322), and TDFKJa1927 (MK775324) (GenBank accession number of D1-D2 28S rDNA  
741 amplicon in parenthesis) isolated from the same Nilgiri Tahr feces from which the type strain  
742 originated.

743

744 **DISCUSSION**

745 Here, we report on the isolation and characterization of multiple novel AGF strains from a  
746 concerted sampling effort of domesticated, zoo-housed, and wild animals from North America,  
747 Europe, and Asia. We propose seven new AGF genera to accommodate these novel strains,  
748 hence expanding the AGF genus-level diversity by more than 50% (From 11 to 18). All newly  
749 described taxa produced filamentous, monocentric thalli, similar to seven of the eleven currently  
750 described genera. Six of the seven novel genera described here produce mono/uniflagellate  
751 zoospores, similar to eight of the eleven currently described taxa. As such, filamentous taxa with  
752 monocentric thalli and monflagellate zoospore appear to be the most common thallus morphology  
753 and zoospore flagellation patterns in the Neocallimastigomycota predominant within currently  
754 described AGF genera. It is interesting to note that for decades, microscopic-based identification  
755 of AGF strains typically assigned isolates with such morphology to the genus *Piromyces* (Ho and  
756 others 1993). We note broad similarities between the microscopic features of *Aklioshbomyces*  
757 *papillarum* and *P. mae* (papillated sporangia), and *Joblinomyces* and *P. Minutus* (zoospores  
758 release through a wide apical portion of sporangial wall, resulting in formation of an empty cup-  
759 shaped sporangium). Unfortunately, the absence of sequence data and extant cultures of these  
760 previously described “*Piromyces*” taxa prevents further investigation into this issue (Ho and  
761 others 1993).

762 The current isolates were obtained in a multi-year effort to describe novel AGF strains  
763 from a wide range of animal hosts in the United States, India, Wales. The majority of novel taxa  
764 described here (5/7 genera, 6/8 species) originated from wild undomesticated animals (Axis  
765 Deer, White Tailed Deer, Mouflon, Boer Goat, and Nilgiri Tahr), underscoring their potential as  
766 novel, yet-untapped reservoir of AGF diversity. Such novelty, which has recently been

767 postulated (Hanafy and others 2018) could be attributed to higher variability in the quality and  
768 quantity of ingested plant material, and the significant daily and seasonal fluctuations in feeding  
769 frequencies.

770 Culture-independent surveys utilizing ITS-1 as a phylogenetic marker (Kittelmann and others  
771 2012; Ligginstoffer and others 2010), and subsequent meta-analysis (Kittelmann and others 2012;  
772 Kittelmann and others 2013) have identified multiple novel yet-uncultured AGF genus-level lineages.  
773 This study has been successful in isolating the first representatives of novel group AL1 from Zebra  
774 and Horse fecal samples. In a prior survey of AGF in zoo-housed animals (Ligginstoffer and others  
775 2010), members of this lineage were encountered in approximately half of the animal hosts examined  
776 (18/35). AL1-affiliated sequences were more predominant in hindgut fermenters (7/9 hosts), and  
777 comprised a relatively high proportion of the AGF community in multiple hosts, e.g. 99.9% in three  
778 different Zebra individuals, 56.7 and 68.3% in two horses, and 29.6% in a Grant's Gazelle). By  
779 comparison, they were only encountered in 11/26 foregut fermenters, where they constituted 0.01%  
780 to 38% of the AGF community in these animals. Further a recent seminal spatial analysis that  
781 analyzed AGF community in samples directly obtained from various locations along horses digestive  
782 tracts (Mura and others 2019) identified AL1 group as a prominent component of the AGF  
783 community in the right ventral (88%), and left dorsal (98%) colons in horses. As such, this novel  
784 genus appears to exhibit a preference for hindgut fermenters of the family Equidae. The reason for  
785 such preferences, and the general preference of some fungal taxa to specific hosts remains unclear  
786 (Callaghan and others 2015; Dagar and others 2015).

787 Surprisingly, comparative analysis of ITS-1 sequences indicated that the Axis Deer, White  
788 tailed Deer, Mouflon-Boer Goat, Boer Goat-domesticated Goat, Nilgiri Tahr, and domesticated Goat-  
789 sheep groups appear to be completely novel, and previously unencountered in prior culture-based or

790 culture-independent studies. ITS-1 sequences from these four isolates did not display mismatches to  
791 common ITS-1 primers, did not have an atypical length that could hinder its amplification or  
792 detection via PCR, and were readily amplified from pure-cultures' genomic DNA. As such, we posit  
793 that the lack of prior observation of these taxa is biologically relevant, and is indicative of their  
794 relatively specific host preference and/or predominance in wild, rather than domesticated herbivores.  
795 Indeed, although 30 animals were screened in the current study, three of these seven novel genera  
796 were isolated only from a single host (White tailed Deer, Axis Deer, and Nilgiri Tahr), while the  
797 other four were isolated from only two hosts (Mouflon and Boer Goat, Boer Goat and domesticated  
798 Goat, domesticated Goat and Sheep, and Zebra-domesticated Horse) (TABLE 1).

799         Collectively, the steady identification of novel taxa in culture-based and culture-independent  
800 surveys, as well as the sparse overlap between these studies strongly suggests that the scope of AGF  
801 diversity in nature is much broader than currently estimated (Kittelman and others 2012; Paul and  
802 others 2018). Compared to the prokaryotic component of the rumen and herbivorous gut, the diversity  
803 of the rumen mycobiome remains woefully understudied. To provide a more thorough understanding  
804 of the AGF diversity in nature, concerted efforts that systematically assess the AGF diversity and  
805 community structure in various spatial (e.g. across various compartments of the herbivorous gut),  
806 temporal (e.g. across the lifespan of an animal), and geographic dimensions in a wide range of  
807 domesticated and wild herbivores is needed. Much remains to be understood regarding the diversity  
808 and community structure of AGF within various locations of the gastrointestinal tract of an animal  
809 host, interspecies stochastic differences between AGF communities in animal subjects, temporal age-  
810 related progression of AGF in animal hosts, and the response of the AGF community to various  
811 factors e.g. feeding patterns, antibiotic administration, animal disease, and co-housing arrangements  
812 and combinations thereof.

813 **ACKNOWLEDGMENTS** We thank Jim and Tammy Austin for providing fecal samples,  
814 Britny Johnson for technical assistance, Dr. Karthick Balasubramanian for his valuable help, Drs.  
815 Rebecca Snyder and Jennifer D'Agostino for providing fecal samples from the Oklahoma City  
816 Zoo, and to the Kerala Forest Department, Munnar for sampling permission (WL10-  
817 51713/2017). This work has been funded by the NSF-DEB Grant number 1557102 to NHY and  
818 MSE, Department of Biotechnology (DBT) project no. BT/PR15694/PBD/26/506/2015 to SSD.

819 **LITERATURE CITED**

- 820 Akin D, Borneman W, Windham W. 1988. Rumen fungi: morphological types from Georgia  
821 cattle and the attack on forage cell walls. *Biosystems* 21 385–391.  
822
- 823 Akin D, Lyon C, Windham W, Rigsby L. 1989. Physical degradation of lignified stem tissues by  
824 ruminal fungi. *Applied and Environmental Microbiology* 55:611–616.  
825
- 826 Ariyawansa HA, Hyde KD, Jayasiri SC, Buyck B, Thilini Chethana KW, Dai DQ, Dai YC,  
827 Daranaama DA, Jayawardena RS, Lücking R, Ghobad-Nejhad M, Niskanen T, Thambugala KM,  
828 Voigt K, Zhao RL, Li G-J, Doilom M, Boonmee S, Yang, ZL, Cai Q, Cui Y-Y, Bahkali AH,  
829 Chen J, Cui BK, Chen JJ, Dayarathne MC, Dissanayake AJ, Ekanayaka AH, Hashimoto A,  
830 Hongsanan S, Jones EBG, Larsson E, Li WJ, Li Q-R, Liu JK, Luo ZL, Maharachchikumbura  
831 SSN, Mapook A, McKenzie EHC, Norphanphoun C, Konta S, Pang KL, Perera RH,  
832 Phookamsak R, Phukhamsakda C, Pinruan U, Randrianjohany E, Singtripop C, Tanaka K, Tian  
833 CM, Tibpromma S, Abdel-Wahab MA, Wanasinghe DN, Wijayawardene NN, Zhang JF, Zhang  
834 H, Abdel-Aziz FA, Wedin M, Westberg M, Ammirati JF, Bulgakov T, Lima DX, Callaghan TM,  
835 Callac P, Chang CH, Coca LF, Dal-Forno M, Dollhofer V, Fliegerová K, Greiner K, Griffith  
836 GW, Ho H-M, Hofstetter V, Jeewon R, Kang JC, Kirk PM, Kytövuori I, Lawrey JD, Xing J, Li  
837 H, Liu ZY, Liu XZ, Liimatainen K, Lumbsch HT, Matsumura M, Moncada B, Nuankaew S,  
838 Parnmen S, de Azevedo Santiago ALCM, Sommai S, de Souza CAF, de Souza-Motta CM, Su  
839 HY, Suetrong S, Wang Y, Wei S-F, Wen T-C, Yuan HS, Zhou LW, Réblová M, Fournier J,  
840 Camporesi E, Luangsa-ard JJ, Tasanathai K, Khonsanit A, Thanakitpipattana D, Somrithipol S,  
841 Diederich P, Millanes AM, Common RS, Stadler M, Yan JY, Li X, Lee HW, Nguyen TTT, Lee



- 842 HB, Battistin B, Marsico O, Vizzini A, Vila J, Ercole E, Eberhardt U, Simonini G, Wen H-A,  
843 Chen X-H, Miettinen O, Spirin V, Hernawati. 2015. Fungal diversity notes 111–252 - taxonomic  
844 and phylogenetic contributions to fungal taxa. *Fungal Diversity* 75:27–274.  
845
- 846 Barr D, Yanke L, Bae H, McAllister T, Cheng K. 1995. Contributions on the morphology and  
847 taxonomy of some rumen fungi from Canada. *Mycotaxon* 54:203–214.  
848
- 849 Barr DJ, Kudo H, Jakober KD, Cheng KJ. 1989. Morphology and development of rumen fungi:  
850 *Neocallimastix* sp., *Piromyces communis*, and *Orpinomyces bovis* gen.nov., sp.nov. *Canadian*  
851 *Journal of Botany* 67 2815–2824.  
852
- 853 Breton A, Bernalier A, Dusser M, Fonty G, Gaillard-Martinie B, Guitlot J. 1990. *Anaeromyces*  
854 *mucronatus* nov. gen., nov. sp. A new strictly anaerobic rumen fungus with polycentric thallus.  
855 *FEMS Microbiology Letters* 70:177–182.  
856
- 857 Breton A, Dusser M, Gaillard-Martine B, Guillot J, Millet L, Prensier G. 1991. *Piromyces*  
858 *rhizinflata* nov. sp., a strictly anaerobic fungus from faeces of the Saharian ass: a morphological,  
859 metabolic and ultrastructural study. *FEMS Microbiology Letters* 82:1–8.  
860
- 861 Calkins S, Elledge NC, Hanafy RA, Elshahed MS, Youssef NH. 2016. A fast and reliable  
862 procedure for spore collection from anaerobic fungi: Application for RNA uptake and long-term  
863 storage of isolates. *Journal of Microbiological Methods* 127:206–213.  
864
- 865 Callaghan TM, Podmirseg SM, Hohlweck D, Edwards JE, Puniya AK, Dagar SS, Griffith GW.

- 866 2015. *Buwchfawromyces eastonii* gen. nov., sp. nov.: a new anaerobic fungus  
867 (Neocallimastigomycota) isolated from buffalo faeces. Mycokeys 9:11–28.  
868
- 869 Dagar SS, Kumar S, Griffith GW, Edwards JE, Callaghan TM, Singh R, Nagpal AK, Puniya AK.  
870 2015. A new anaerobic fungus (*Oontomyces anksri* gen. nov., sp. nov.) from the digestive tract  
871 of the Indian camel (*Camelus dromedarius*). Fungal Biology 19:731–737.  
872
- 873 Gold JJ, Heath IB, Bauchop T. 1988. Ultrastructural description of a new chytrid genus of  
874 caecum anaerobe, *Caecomycetes equi* gen. nov., sp. nov., assigned to the Neocallimasticaceae  
875 BioSystems 21:403–415.  
876
- 877 Gruninger RJ, Puniyab AK, Callaghanc TM, Edwardsc JE, Youssef N, Dagare SS, Fliegerova K,  
878 Griffith GW, Forster R, Tsang A et al. 2014. Anaerobic Fungi (Phylum Neocallimastigomycota):  
879 Advances in understanding of their taxonomy, life cycle, ecology, role, and biotechnological  
880 potential. FEMS Microbiology Ecology. 90:1–17.  
881
- 882 Hanafy RA, Elshahed MS, Ligginstoffer AS, Griffith GW, Youssef NH. 2017. *Pecoramyces*  
883 *ruminantium*, gen. nov., sp. nov., an anaerobic gut fungus from the feces of cattle and sheep.  
884 Mycologia 109:231–243.  
885
- 886 Hanafy RA, Elshahed MS, Youssef NH. 2018. *Feramyces austinii*, gen. nov., sp. nov., an  
887 anaerobic gut fungus from rumen and fecal samples of wild Barbary sheep and fallow deer.  
888 Mycologia 110:513–525.  
889

- 890 Heath BI, Bauchop T, Skipp RA. 1983. Assignment of the rumen anaerobe *Neocallimastix*  
891 *frontalis* to the Spizellomycetales (Chytridiomycetes) on the basis of its polyflagellate zoospore  
892 ultrastructure. Canadian Journal of Botany 61:295–307.  
893
- 894 Ho YW, Bar DJS, Abdullah N, Jalaludin S, Kudo H. 1993a. A new species of *Piromyces* from  
895 the rumen of deer in Malaysia. Mycotaxon 47:285–293.  
896
- 897 Ho YW, Barr DJS. 1995. Classification of anaerobic gut fungi from herbivores with emphasis on  
898 rumen fungi from malaysia. Mycologia 87:655–677.  
899
- 900 Hungate RE. 1969. A roll tube method for cultivation of strict anaerobes. Methods in  
901 Microbiology 3:117–132.  
902
- 903 Joshi A, Lanjekar VB, Dhakephalkar PK, Callaghan TM, Griffith GW, Dagar SS. 2018.  
904 *Liebetanzomyces polymorphus* gen. et sp. nov., a new anaerobic fungus (Neocallimastigomycota)  
905 isolated from the rumen of a goat. Mycokeys 40:89–110.  
906
- 907 Kittelmann S, G. E. Naylor, J. P. Koolaard, Janssen PH. 2012. A Proposed Taxonomy of  
908 Anaerobic Fungi (Class Neocallimastigomycetes) Suitable for Large-Scale Sequence-Based  
909 Community Structure Analysis. PLoS ONE 7:e36866.  
910
- 911 Kittelmann S, H. Seedorf, W. A. Walters, J. C. Clemente, R. Knight, J. I. Gordon, Janssen PH.  
912 2013. Simultaneous Amplicon Sequencing to Explore Co-Occurrence Patterns of Bacterial,

913 Archaeal and Eukaryotic Microorganisms in Rumen Microbial Communities. PLoS ONE  
914 8:e47879.  
915  
916 Kumar S, Stecher G, Tamura K. 2016. MEGA7: Molecular evolutionary genetics analysis  
917 version 7.0 for bigger datasets. *Molecular Biology and Evolution* 33:1870–1874.  
918  
919 Li GJ, Hyde KD, Zhao RL, Hongsanan S, Abdel-Aziz FA, Abdel-Wahab MA, Alvarado P,  
920 Alves-Silva G, Ammirati JF, Ariyawansa HA, Baghela A, Bahkali AH, Beug M, Bhat DJ,  
921 Bojantchev D, Boonpratuang T, Bulgakov TS, Camporesi E, Boro MC, Ceska O, Chakraborty D,  
922 Chen JJ, Chethana KWT, Chomnunti P, Consiglio G, Cui BK, Dai DQ, Dai YC, Daranagama  
923 DA, Das K, Dayarathne MC, De Crop E, De Oliveira RJV, de Souza CAF, de Souza JI,  
924 Dentinger BTM, Dissanayake AJ, Doilom M, Drechsler-Santos ER, Ghobad-Nejhad M, Gilmore  
925 SP, Góes-Neto A, Gorczak M, Haitjema CH, Hapuarachchi KK, Hashimoto A, He MQ, Henske  
926 JK, Hirayama K, Iribarren MJ, Jayasiri SC, Jayawardena RS, Jeon SJ, Jerônimo GH, Jesus AL,  
927 Jones EBG, Kang JC, Karunarathna SC, Kirk PM, Konta S, Kuhnert E, Langer E, Lee HS, Lee  
928 HB, Li WJ, Li XH, Liimatainen K, Lima FX, Lin CG, Liu JK, Liu XZ, Liu ZY, Luangsa-ard JJ,  
929 Lücking R, Lumbsch HT, Lumyong S, Leñaño EM, Marano AV, Matsumura M, McKenzie EHC,  
930 Mongkolsamrit S, Mortimer PE, Nguyen TTT, Niskanen T, Norphanphoun C, O'Malley MA,  
931 Parnmen S, Pawłowska J, Perera RH, Phookamsak R, Phukhamsakda C, Pires-Zottarelli CLA,  
932 Raspé O, Reck MA, Rocha SCO, de Santiago ALCMA, Senanayake IC, Setti L, Shang QJ,  
933 Singh SK, Sir EB, Solomon KV, Song J, Srikitkulchai P, Stadler M, Suetrong S, Takahashi H,  
934 Takahashi T, Tanaka K, Tang LP, Thambugala KM, Thanakitpipattana D, Theodorou MK,  
935 Thongbai B, Thummarukcharoen T, Tian Q, Tibpromma S, Verbeken A, Vizzini A, Vlasák J,

- 936 Voigt K, Wanasinghe DN, Wang Y, Weerakoon G, Wen HA, Wen TC, Wijayawardene NN,  
937 Wongkanoun S, Wrzosek M, Xiao YP, Xu JC, Yan JY, Yang J, Da Yang S, Hu Y, Zhang JF,  
938 Zhao J, Zhou LW, Peršoh D, Phillips AJL, Maharachchikumbura SSN. 2016. Fungal diversity  
939 notes 253–366: taxonomic and phylogenetic contributions to fungal taxa. *Fungal Diversity* 78:1–  
940 237.
- 941
- 942 Li J, Health B, Bauchop T. 1990. *Piromyces mae* and *Piromyces dumbonica*, two new species of  
943 uniflagellate anaerobic chytridiomycete fungi from the hindgut of the horse and elephant.  
944 *Canadian Journal of Botany* 68:1021–1033.
- 945
- 946 Liggenstoffer AS, Youssef NH, Couger MB, Elshahed MS. 2010 Phylogenetic diversity and  
947 community structure of anaerobic fungi (Phylum Neocallimastigomycota) in ruminant and non-  
948 ruminant herbivores. *The ISME Journal* 4:1225–1235.
- 949
- 950 Ljungdahl LG. 2008 The cellulase/hemicellulase system of the anaerobic fungus *Orpinomyces*  
951 PC-2 and aspects of its use. *Annals of the New York Academy of Sciences* 1125 308–321.
- 952
- 953 McSweeney CS, Denman SE, Mackie RI. 2005. Rumen bacteria. In: Makkar HPS, McSweeney  
954 CS, eds. *Methods in Gut Microbial Ecology for Ruminants*. Dordrecht, Netherlands: Springer. p.  
955 23–37.
- 956

- 957 Mura E, Edwards J, Kittelmann S, Kaerger K, Voigt K, Mrázek J, Moniello G, Fliegerova K.  
958 2019. Anaerobic fungal communities differ along the horse digestive tract. *Fungal Biology*  
959 123:240–246.
- 960
- 961 Nagpal R, Puniya AK, Sehgal JP, Singh K. 2011. In vitro fibrolytic potential of anaerobic rumen  
962 fungi from ruminants and non-ruminant herbivores. *Mycoscience* 52:31–38.
- 963
- 964 Nakamura T, Yamada KD, Tomii K, Katoh K. 2018. Parallelization of MAFFT for large-scale  
965 multiple sequence alignments. *Bioinformatics* 34:2490–2492.
- 966
- 967 Ozkose E, Thomas BJ, Davies DR, Griffith GW, Theodorou MK. 2001. *Cyllamyces aberensis*  
968 gen. nov. sp.nov., a new anaerobic gut fungus with branched sporangiophores isolated from  
969 cattle. *Canadian Journal of Botany* 79:666–673.
- 970
- 971 Paul SS, Bu D, Xu J, Hyde KD, Yu Z. 2018. A phylogenetic census of global diversity of gut  
972 anaerobic fungi and a new taxonomic framework. *Fungal Diversity* 89:253–266.
- 973
- 974 Paul SS, Deb SM, Punia BS, Singh D, Kumar R. 2010. Fibrolytic potential of anaerobic fungi  
975 (*Piromyces* sp.) isolated from wild cattle and blue bulls in pure culture and effect of their  
976 addition on in vitro fermentation of wheat straw and methane emission by rumen fluid of  
977 buffaloes. *Journal of the Science of Food and Agriculture* 90:1218–1226.
- 978
- 979 Ranganathan A, Smith OP, Youssef NH, Struchtemeyer CG, Atiyeh HK, Elshahed MS. 2017.

980 Utilizing anaerobic fungi for two-stage sugar extraction and biofuel production from  
981 lignocellulosic biomass. *Frontiers in Microbiology* 8:635.  
982  
983 Tuckwell DS, Nicholson MJ, McSweeney CS, Theodorou MK, Brookman JL. 2005. The rapid  
984 assignment of ruminal fungi to presumptive genera using ITS-1 and ITS2 RNA secondary  
985 structures to produce group-specific fingerprints. *Microbiology* 151:1557–1567.  
986  
987 Wang X, Liu X, Groenewald JZ. 2017. Phylogeny of anaerobic fungi (phylum  
988 Neocallimastigomycota), with contributions from yak in China. *Antonie Van Leeuwenhoek*  
989 110:87–103.  
990  
991 Young D, Dollhofer V, Callaghan TM, Reitberger S, Leuhn M, Benz JP. 2018. Isolation,  
992 identification and characterization of lignocellulolytic aerobic and anaerobic fungi in one- and  
993 two-phase biogas plants. *Bioresour Technol* 268:470–479.  
994  
995 Youssef NH, Couger MB, Struchtemeyer CG, Liggenstoffer AS, Prade RA, Najjar FZ, Atiyeh  
996 HK, Wilkins MR, Elshahed MS. 2013. Genome of the anaerobic fungus *Orpinomyces* sp. C1A  
997 reveals the unique evolutionary history of a remarkable plant biomass degrader. *Applied and*  
998 *Environmental Microbiology* 79:4620–4634.  
999  
1000  
1001  
1002  
1003

1004 **LEGENDS AND FOOTNOTES.**

1005 **FIG. 1.** Macroscopic features of colony morphology on agar media and fungal biomass in liquid  
1006 media for (a) *Agriosomyces longus* strain MS2, brown circular colonies and thin fungal biofilm  
1007 in liquid medium. (b) *Aklioshbomyces papillarum* strain WT-2, beige circular colonies with a  
1008 brown central core of sporangia and thick fungal biofilm in liquid medium that firmly attaches to  
1009 the tube's glass surface, note the inverted tube shows how the fungus thalli attached to the tube.  
1010 (c) *Capellomyces foraminis* strain BGB-11, small brown circular colonies with dark center and  
1011 thin fungal biofilm in liquid medium. (d) *Capellomyces elongatus* strain GFKJa1916, compact  
1012 cottony off-white circular colonies with a fluffy central core of sporangia surrounded by  
1013 radiating sporangia and thin fungal biofilm in liquid medium that attach to the tube's glass. (e)  
1014 *Ghazallomyces constrictus* strain Axs-31, white circular colonies on roll tubes and thick fungal  
1015 biofilm in liquid medium. (f) *Joblinomyces apicalis* strain GFH683, beige circular colonies with  
1016 a brown central core of sporangia and thin fungal biofilm in liquid medium. (g) *Khyollomyces*  
1017 *ramosus* strain ZS-33, yellowish brown colonies of irregular shape on agar medium and loose  
1018 fungal thalli with sand-like appearance. (h) *Tahromyces munnarensis* strain TDFKJa193 white  
1019 circular colonies with fluffy center, surrounded by dotted circles of fungal thalli and thick fungal  
1020 biofilm in liquid medium that attach to the tube's glass.

1021 **FIG. 2.** Microscopic features of *Agriosomyces longus* (Clade 1, Mouflon-Boer Goat) strain  
1022 MS2. Light (e-h) and scanning electron (a and i) micrographs are shown. DAPI staining for  
1023 nuclei visualizing using a fluorescence microscope equipped with a Brightline DAPI high-  
1024 contrast filter set (c). Overlay image is shown in (d). (a) A monoflagellate zoospore. (b) A  
1025 biflagellate zoospore. (c-d) Monocentric thalli, with nuclei occurring in sporangia, not in rhizoids  
1026 or sporangiophores. (e-f) Endogenous globose sporangia with tightly constricted necks and



1027 subsporangial swellings (arrows). (g-h) Exogenous globose sporangia, note the swollen  
1028 sporangiophores. (i) An empty sporangium after zoospore release and rupturing of the sporangial  
1029 wall. Bar: a=5  $\mu\text{m}$ , b=20  $\mu\text{m}$  c-i=50  $\mu\text{m}$ .

1030 **FIG. 3.** Microscopic features of *Aklioshbomyces papillarum* (Clade 2, White-Tailed Deer) strain  
1031 WT-2. Light (a-e, and g-q) and scanning electron (f) micrographs are shown. Light microscopy  
1032 pictures were examined after staining with lactophenol cotton blue (a-c, e, and g-q), as well as  
1033 following nuclei staining with DAPI (d). (a) A monoflagellate zoospore. (b) A biflagellate  
1034 zoospore. (c) A triflagellate zoospore. (d) Monocentric thalli, with nuclei occurring in sporangia,  
1035 not in rhizoids or sporangiophores. (e-g) Endogenous sporangial development: (e) Ovoid  
1036 sporangium with single rhizoidal system, (f) Ovoid sporangium with two main rhizoidal systems,  
1037 (g) Globose pseudo-intercalary sporangium, between two main rhizoidal systems. (h-k)  
1038 Exogenous sporangial development: (h) Globose sporangium on a very short sporangiophore, (i)  
1039 Ellipsoidal sporangium, (j) Obpyriform sporangium on a long sporangiophore, (k) Obpyriform  
1040 sporangium. (l) Ellipsoidal sporangium. (m) Sporangia with lateral single papilla, (n-p)  
1041 Sporangia with terminal single papilla. (q) Sporangium with two papillae. Bar: a-c, e, f, n & o  
1042 =20  $\mu\text{m}$ , g-k, p & q =50  $\mu\text{m}$ , d, l & m =100  $\mu\text{m}$ .

1043 **FIG. 4.** Microscopic features of *Capellomyces foraminis* (Clade 3, Boer Goat) strain BGB-11.  
1044 Light (a-i, l, o & p) and scanning electron (j, k, m, n, q & r) micrographs are shown. Light  
1045 microscopy pictures were examined after staining with lactophenol cotton blue (a-e, h, i, & o), as  
1046 well as following nuclei staining with DAPI (f). Overlay image is shown in (g). (a) A  
1047 monoflagellate zoospore. (b) A biflagellate zoospore. (c) Zoospore cyst, arrow points to the shed  
1048 flagellum. (d) Germinating zoospore cyst producing a germ tube (arrow). (e) Rhizoidal system  
1049 development. (f-g) Monocentric thalli with nuclei occurring in sporangia, not in rhizoids or

1050 sporangiophores. (h-i) Endogenous sporangial development: (h) Ellipsoidal sporangium with two  
1051 main rhizoidal systems (arrows), (i) Ovoid sporangium with single rhizoidal system. (j-q)  
1052 Exogenous sporangial development: (j) Exogenous sporangium with a short sporangiophore (Sp),  
1053 note the empty zoospore cyst (Zc). (k) Ovoid sporangium with a long sporangiophore, (l) Ovoid  
1054 sporangium on a long sporangiophore ends with sub-sporangial swelling (arrow), (m) Collapsed  
1055 empty sporangium on a long sporangiophore ends with sub-sporangial swelling (arrow), (n)  
1056 Constricted ellipsoidal sporangium, (o-p) Globose Sporangia. (q) Zoospores are released through  
1057 apical pore. (r) An empty sporangium following zoospores release. Abbreviations: (Sp),  
1058 sporangiophore; (Zc), zoospore cyst. Bar: a-j, l, o & p =20  $\mu$ m, k, m, n, q & r =50  $\mu$ m.

1059 **Fig 5.** Microscopic features of *Capellomyces elongatus* (Clade 3, domesticated Goat) strain  
1060 GFKJa1916. Differential interference contrast (a, d-f and i-l), scanning (g-h), phase contrast (b)  
1061 and fluorescence (c) micrographs. (a) A monoflagellate zoospores. (b-c) Monocentric thalli;  
1062 nuclei were observed in sporangia, not in rhizoids or sporangiophores. (d-g) Endogenous  
1063 sporangia. (d) Globose endogenous sporangium with one main rhizoidal systems. (e-f)  
1064 Endogenous sporangia with multiple rhizoidal systems. (g) Endogenous sporangium on wheat  
1065 straw fibers. (h-l) Exogenous sporangia: (h) ovoid-shaped sporangium with long sporangiophore.  
1066 (i) Multiple ovoid, and globose exogenous sporangia with long sporangiophores. (j)  
1067 Multisporangiate thallus with two sporangia (same shape). (k-l) Multisporangiate thallus with  
1068 two sporangia (different shape).  
1069 Scale bar = 20  $\mu$ m.

1070 **FIG. 6.** Microscopic features of *Ghazallomyces constrictus* (Clade 4, Axis Deer) strain Axs-31.  
1071 Light (a-h, f, k and m-p) and scanning electron (i, j, l and q) micrographs are shown. Light  
1072 microscopy pictures were examined after staining with lactophenol cotton blue (a, d-h, k, and m-

1073 p), as well as following nuclei staining with DAPI (b). Overlay image is shown in (c). (a) A  
1074 polyflagellate zoospore. (b-c) Monocentric thalli, with nuclei occurring in sporangia, not in  
1075 rhizoids or sporangiophores. (d-g) Endogenous sporangia with tightly constricted necks (arrows):  
1076 (d) Young globose sporangium, (e) Young tubular sporangium, (f) Mature clavate sporangium,  
1077 (g) and Mature ellipsoidal sporangium. (h-p) Exogenous sporangia: (h) Young sporangium on a  
1078 short flattened sporangiophore (Sp), note the persistent empty zoospore cyst (Zc) and the  
1079 rhizoidal system (R), (i) Ovoid sporangium on short sporangiophore, (j) Ellipsoidal sporangium  
1080 on long sporangiophore, (k) ovoid sporangium on an eggcup-shaped sporangiophore (arrow), (l)  
1081 Globose sporangium, (m) Constricted ellipsoidal sporangium with tightly constricted neck  
1082 (arrow) on long sporangiophore, (n) Pyriform sporangium, note the fine septum at the base of  
1083 sporangium (arrow), (o) Bowling pin-shaped sporangium, (p) Rhomboidal sporangium with  
1084 constricted neck and fine septum (arrows), note the persistent empty zoospore cyst (Zc). (q)  
1085 Zoospores are released through apical pore followed by collapse of the sporangial wall.  
1086 Abbreviations: (Sp), sporangiophore; (Zc), zoospore cyst; (R), rhizoid. Bar: a=20µm, b-q=50  
1087 µm.

1088 **FIG. 7.** Microscopic features of *Joblinomyces apicalis* (Clade 5, domesticated Goat and Sheep)  
1089 strain GFH683. Phase contrast (b, c and e), fluorescence (d, f), scanning electron (g-h, and m)  
1090 differential interference (k-l) micrographs. (a) A monoflagellate zoospore. (b) A biflagellate  
1091 spherical zoospore. (c-f) Monocentric thalli; nuclei were observed in sporangia, not in rhizoids or  
1092 sporangiophores, note the empty cup-shaped sporangium after zoospore release (arrow). (g)  
1093 Ovoid endogenous sporangium. (h-i) Exogenous sporangia: (h) Ovoid sporangium with short  
1094 sporangiophore. (i) Subglobose sporangium with long sporangiophore. (j-l) Zoospore release: (j)  
1095 Dissolution of the apical portion of sporangial wall (arrow). (k-l) Cup-shaped sporangia with

1096 wide apical pores and intact sporangial walls (arrow). (g) Colonization of rice straw fibers by  
1097 fungal rhizoids and emanating.

1098 Scale bar = 20  $\mu$ M.

1099 **FIG. 8.** Microscopic features of *Khyollomyces ramosus* (Clade 6, Zebra-Horse) strain ZS-33 (a-  
1100 q) and distinct resting stage structure from strain HoCal4.A2.2 (r). Light (a-e, g, i-j, l & q) and  
1101 scanning electron (f, h, k, m & n-p) micrographs are shown. DAPI staining for nuclei visualizing  
1102 using a fluorescence microscope equipped with a Brightline DAPI high-contrast filter set (d).

1103 Overlay image is shown in (e). (a) A uniflagellate zoospore. (b) Zoospore cyst after shedding of  
1104 the flagellum. (c) Germinating zoospore cyst producing a germ tube (arrow). (d-e) Monocentric  
1105 thalli, with nuclei occurring in sporangia, not in rhizoids or sporangiophores. (f) hyphal  
1106 structures with intercalary swellings in wide hyphae (arrows). (g-h) Endogenous sporangial  
1107 development: (g) Young subglobose sporangium with single rhizoidal system, (i) Mature  
1108 ellipsoidal sporangium with two main rhizoidal systems. (i-m) Exogenous sporangial  
1109 development: (i) Multisporangiate thallus with two sporangia, (j) Multisporangiate thallus with  
1110 four sporangia, (k) Heart-shaped sporangium. (l) Ovoid sporangium (labeled S) on a wide  
1111 flattened sporangiophore (labeled Sp), (m) Pyriform sporangium. (n) Zoospores are released  
1112 through apical pore. (o-p) Empty sporangia with intact sporangial walls after zoospores  
1113 discharge. (q) Mature sporangia detached from hyphae or sporangiophores. (r) Resting stages  
1114 from strain HoCal4.A2.2. Bar: a-c & f-g =20  $\mu$ m, d-e, k & m-q =50  $\mu$ m and h-j & l =100  $\mu$ m.

1115 **FIG. 9.** Microscopic features of *Tahromyces munnarensis* (Clade 7, Nilgiri Tahr) strain  
1116 TDFKJa193. Differential interference contrast (a, f and i-l), phase contrast (b, d, g and h),  
1117 fluorescence (c and e) micrographs. (a) A monoflagellate and triflagellate zoospores. (b-e)  
1118 Monocentric thalli; nuclei were observed in sporangia, not in rhizoids or sporangiophores. (f-g)

1119 Endogenous sporangia. (f) Ovoid endogenous sporangium with two rhizoidal systems, note the  
1120 sub-sporangial swelling (arrow). (g) Endogenous sporangium with branched rhizoids. (h-l)  
1121 Exogenous sporangia: (h) Globose sporangium with short swollen sporangiophore (arrow). (i-j)  
1122 Exogenous sporangia with sub-sporangial swellings and constricted necks (arrow). (k) Ovoid  
1123 sporangium with septum at the sporangial base (arrow). (l) Zoospore release through dissolution  
1124 of a wide apical pore. Scale bar = 20  $\mu$ M.

1125 **FIG. 10.** Phylogenetic affiliation of the 7 newly described genera to other AGF genera based on  
1126 the sequences of the D1–D2 domains of nuc 28S rDNA gene (a), and partial ITS-1 sequences  
1127 (b). Sequences were aligned in MAFFT (Nakamura and others 2018) and the alignment was used  
1128 to construct phylogenetic trees in MEGA7 (Kumar and others 2016) using a maximum likelihood  
1129 approach. Bootstrap values from 100 replicates are shown for nodes with more than 70%  
1130 bootstrap support



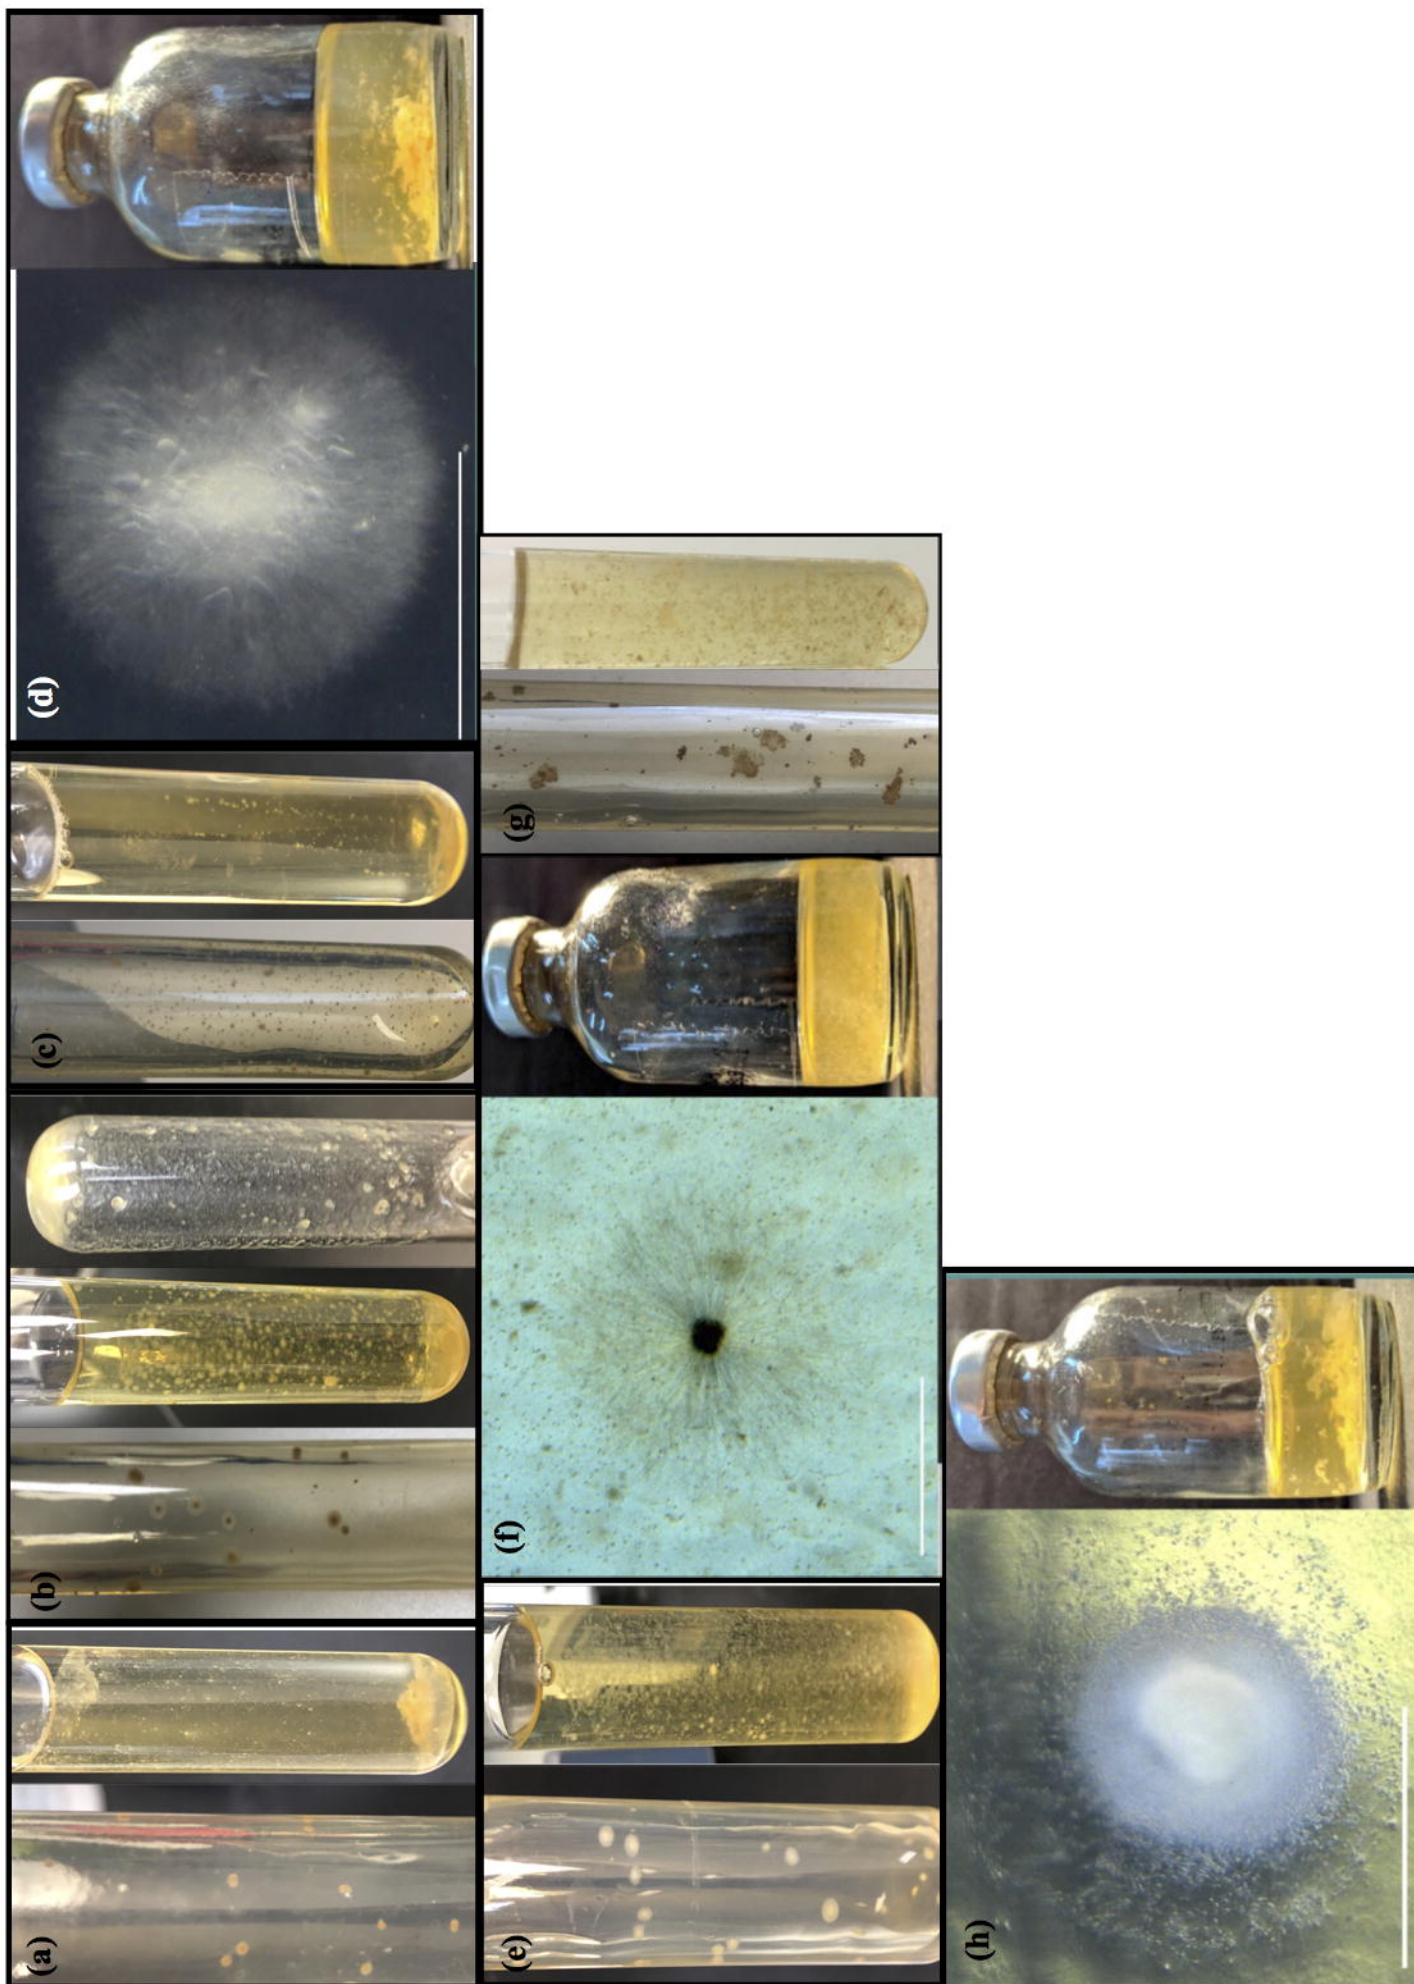

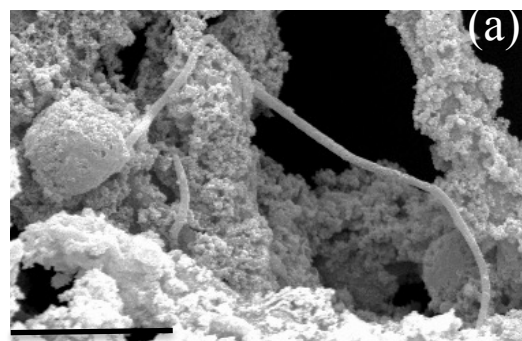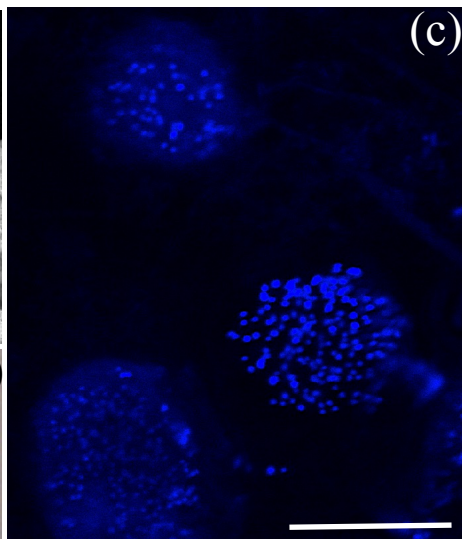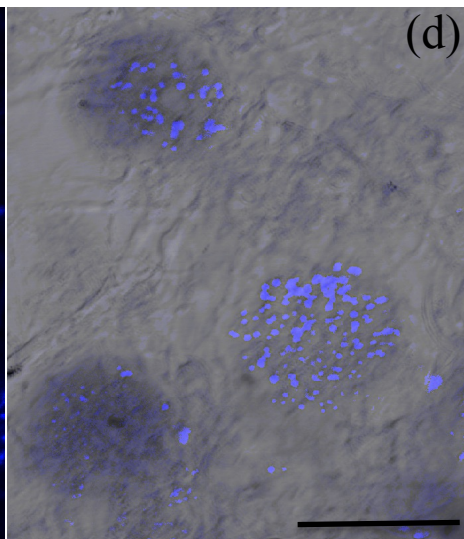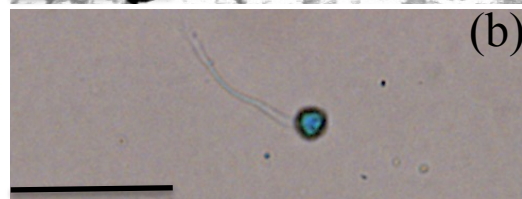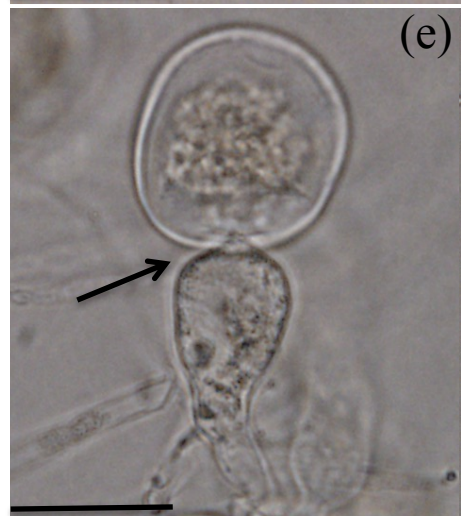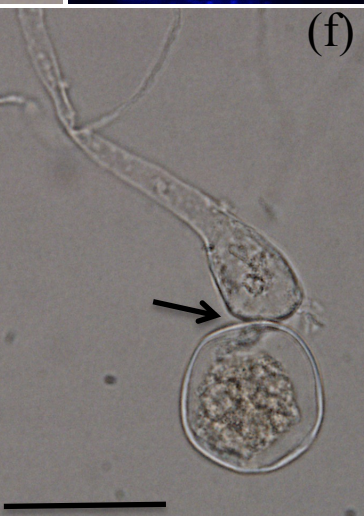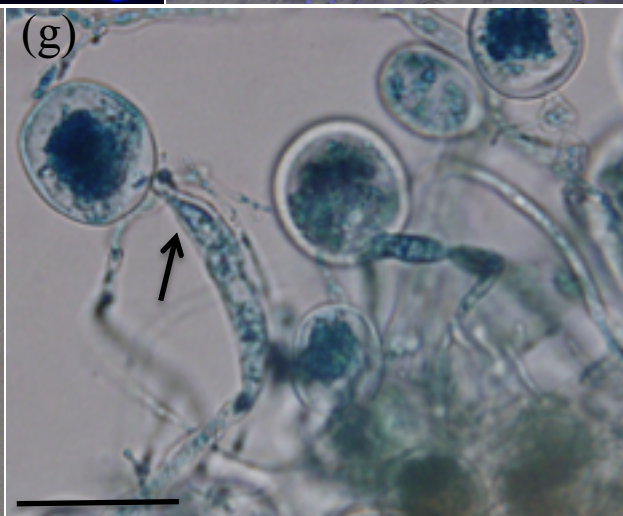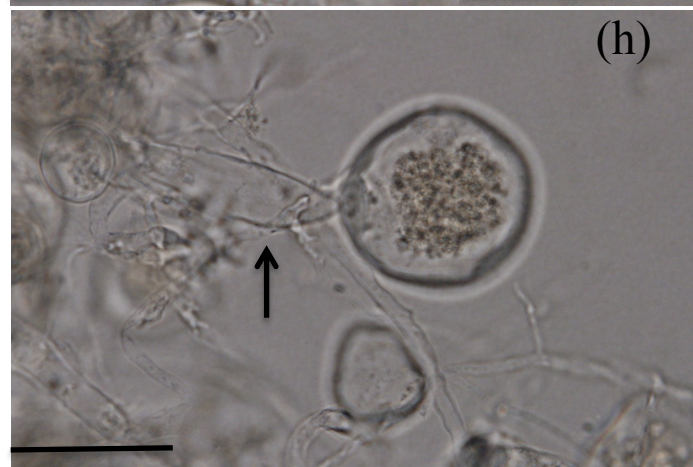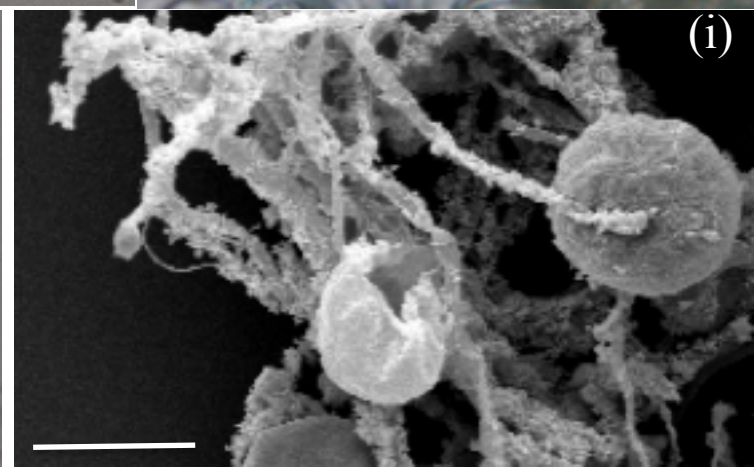



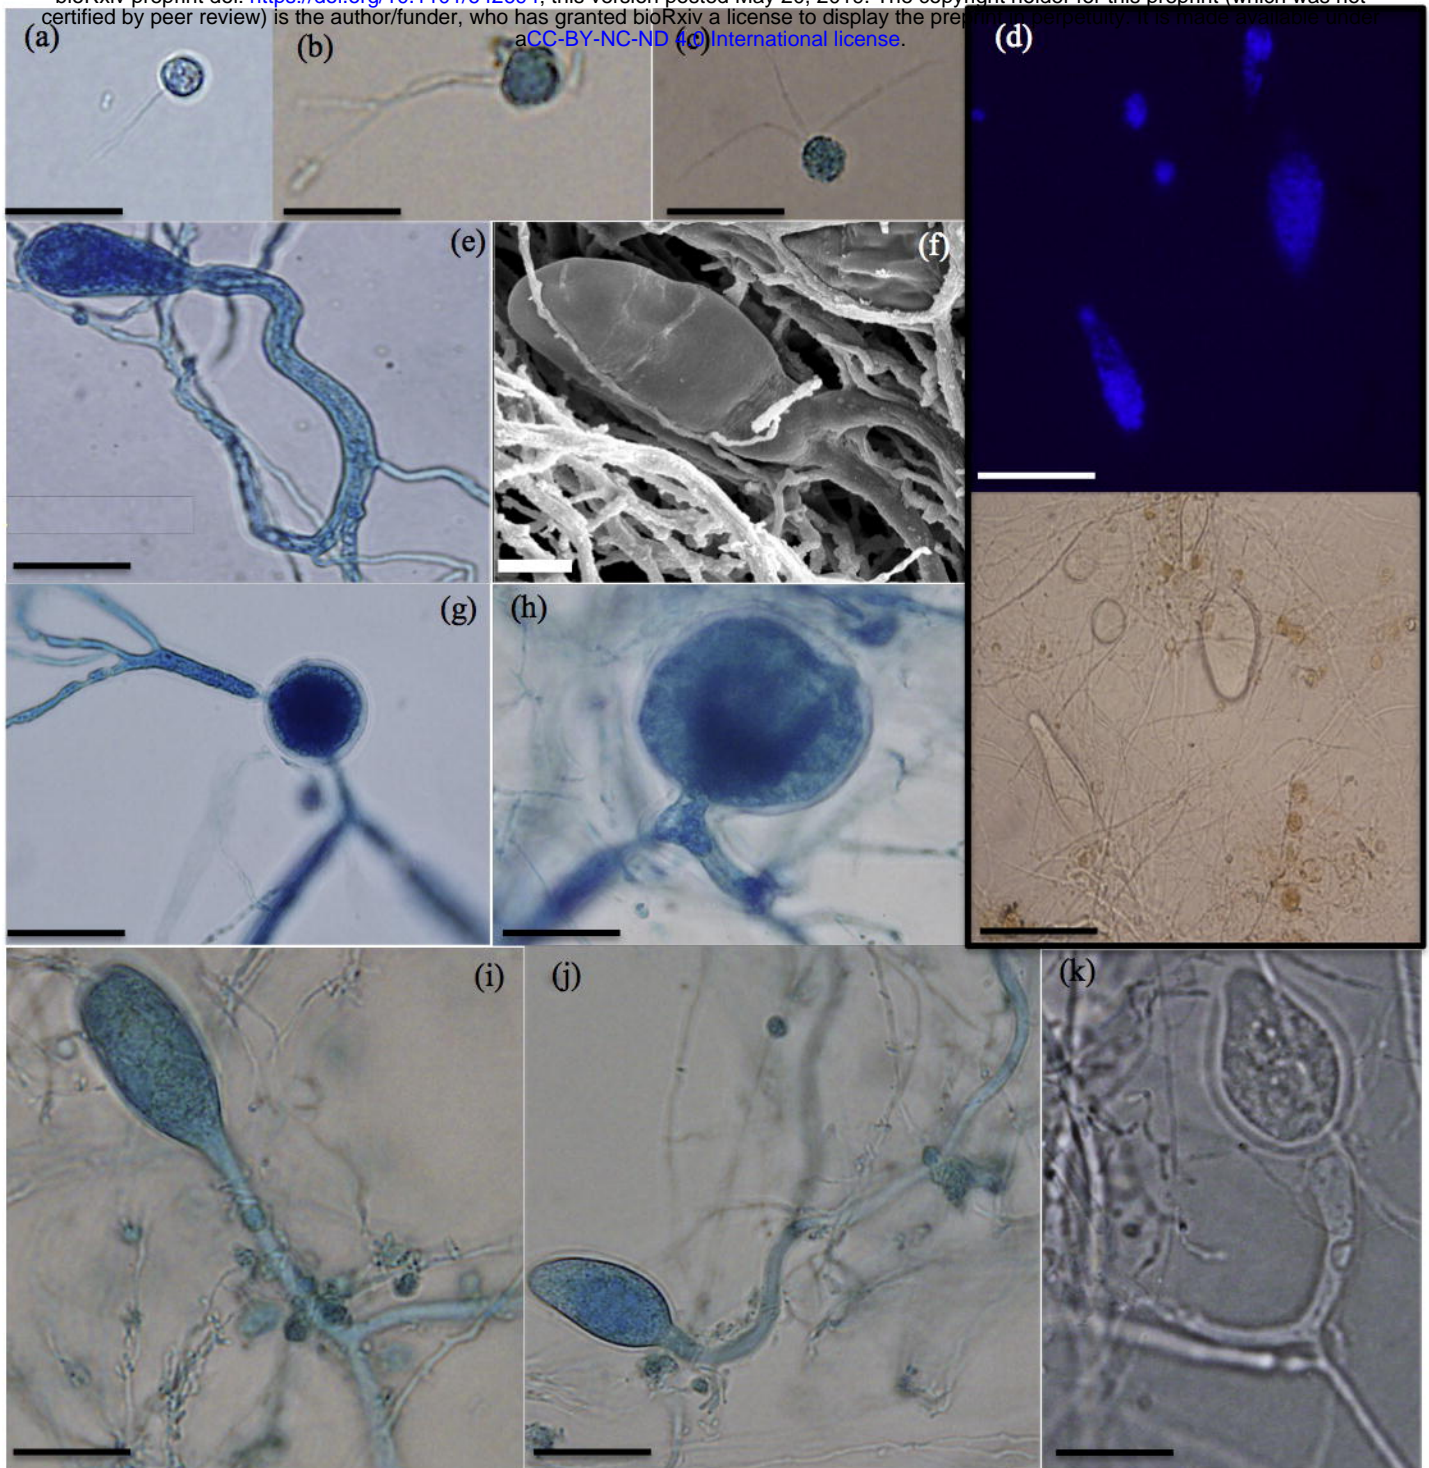

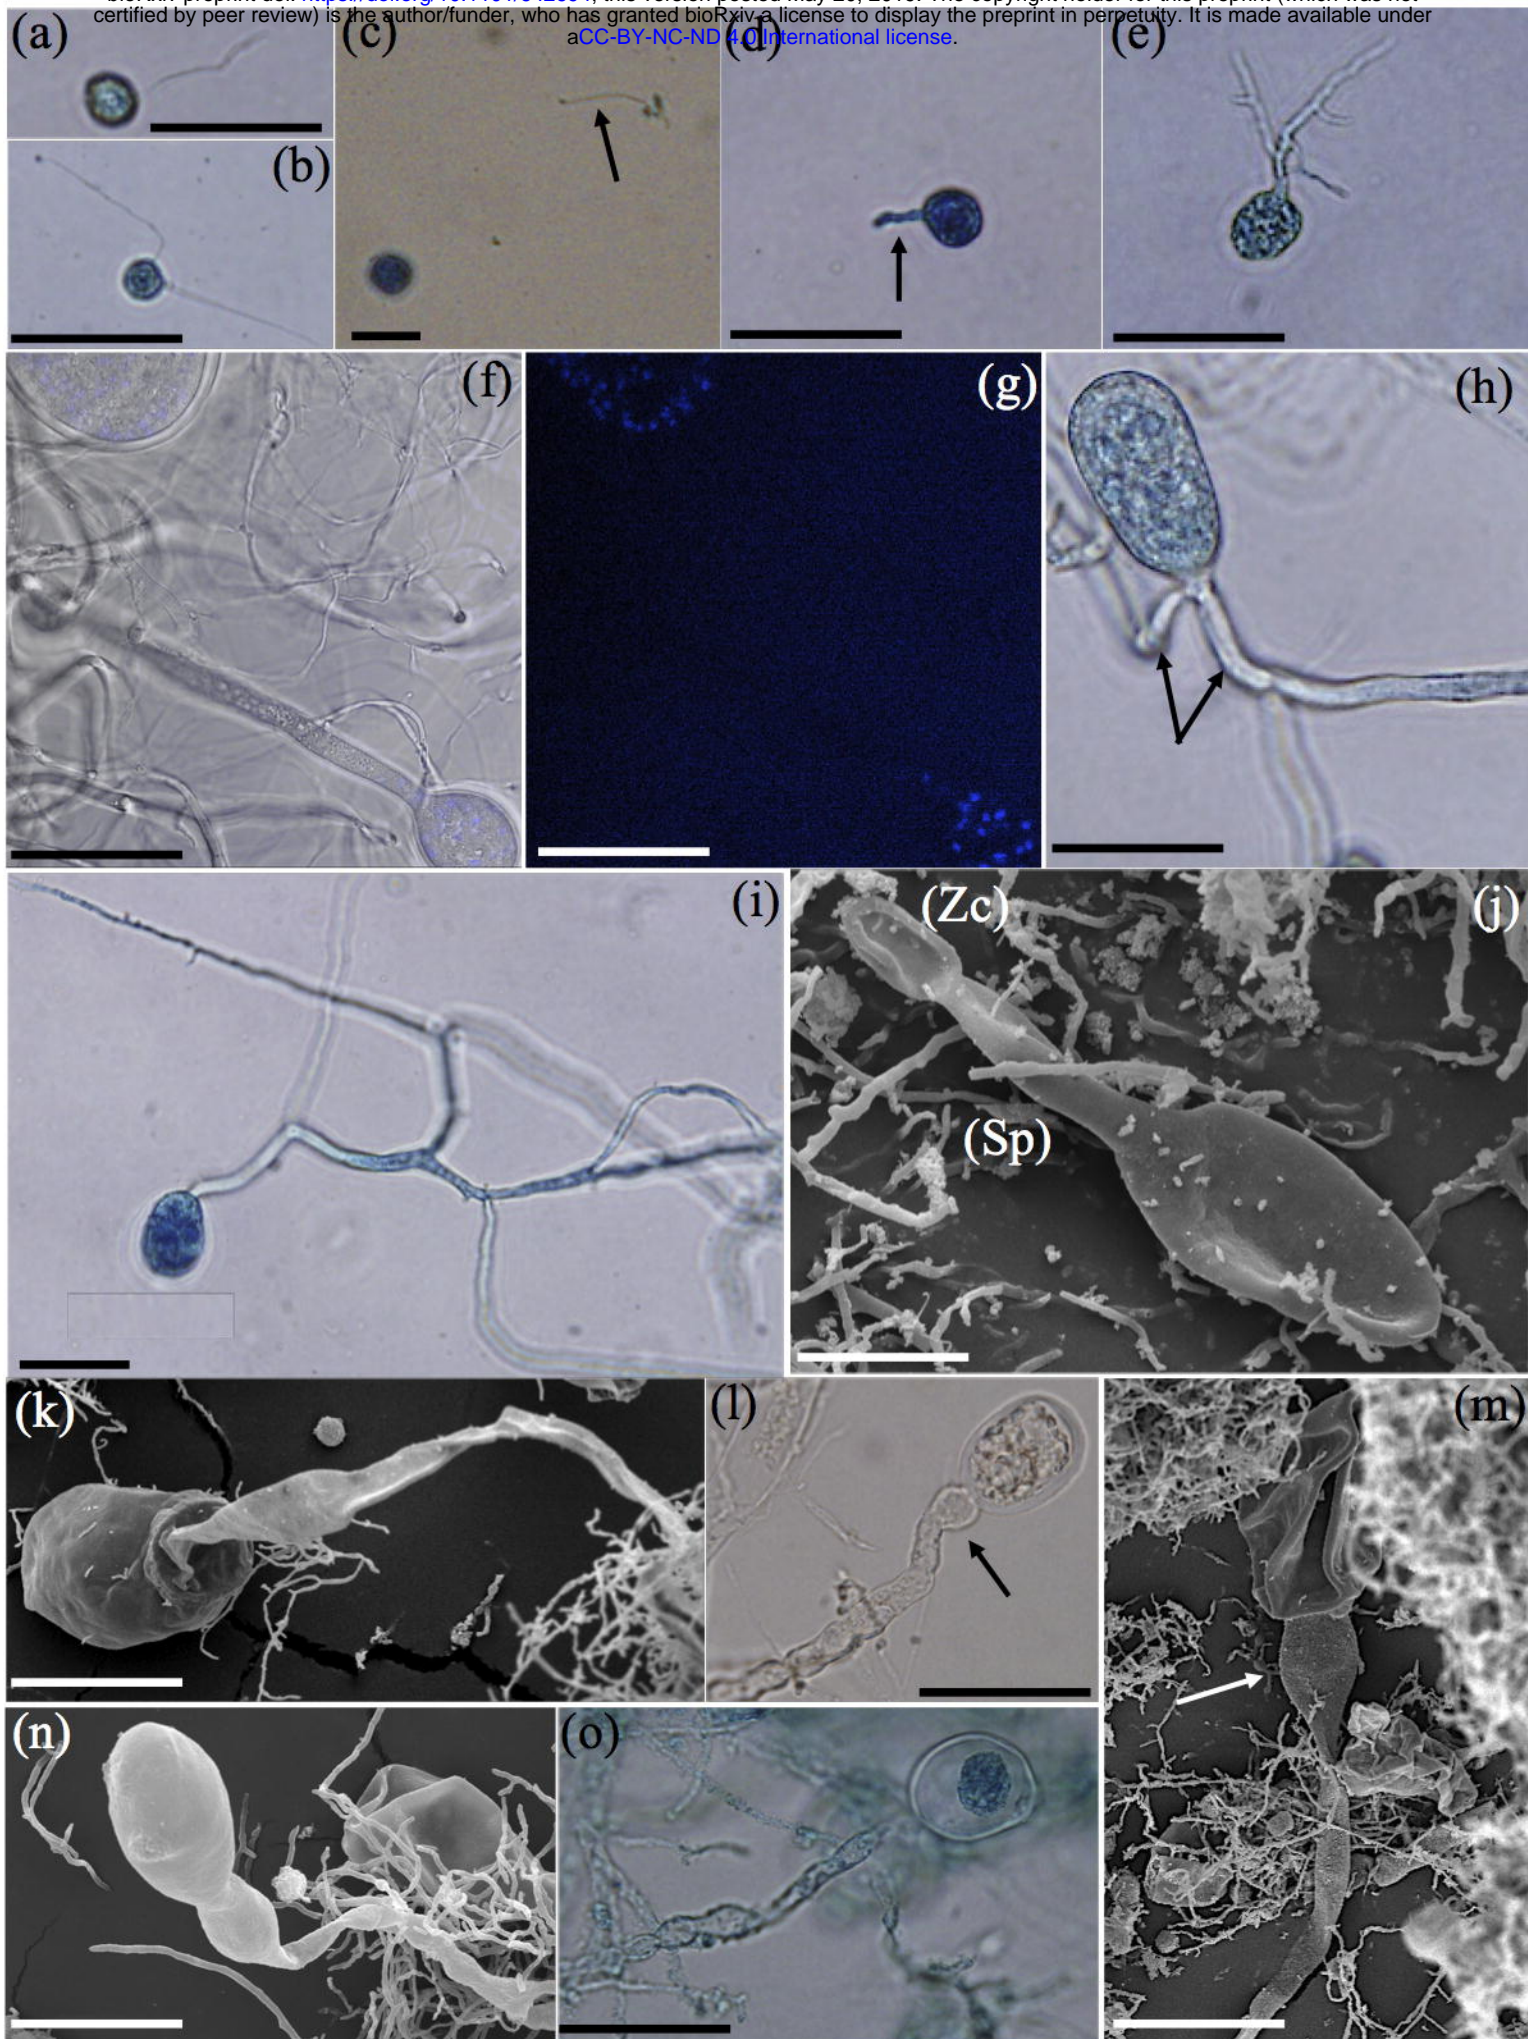

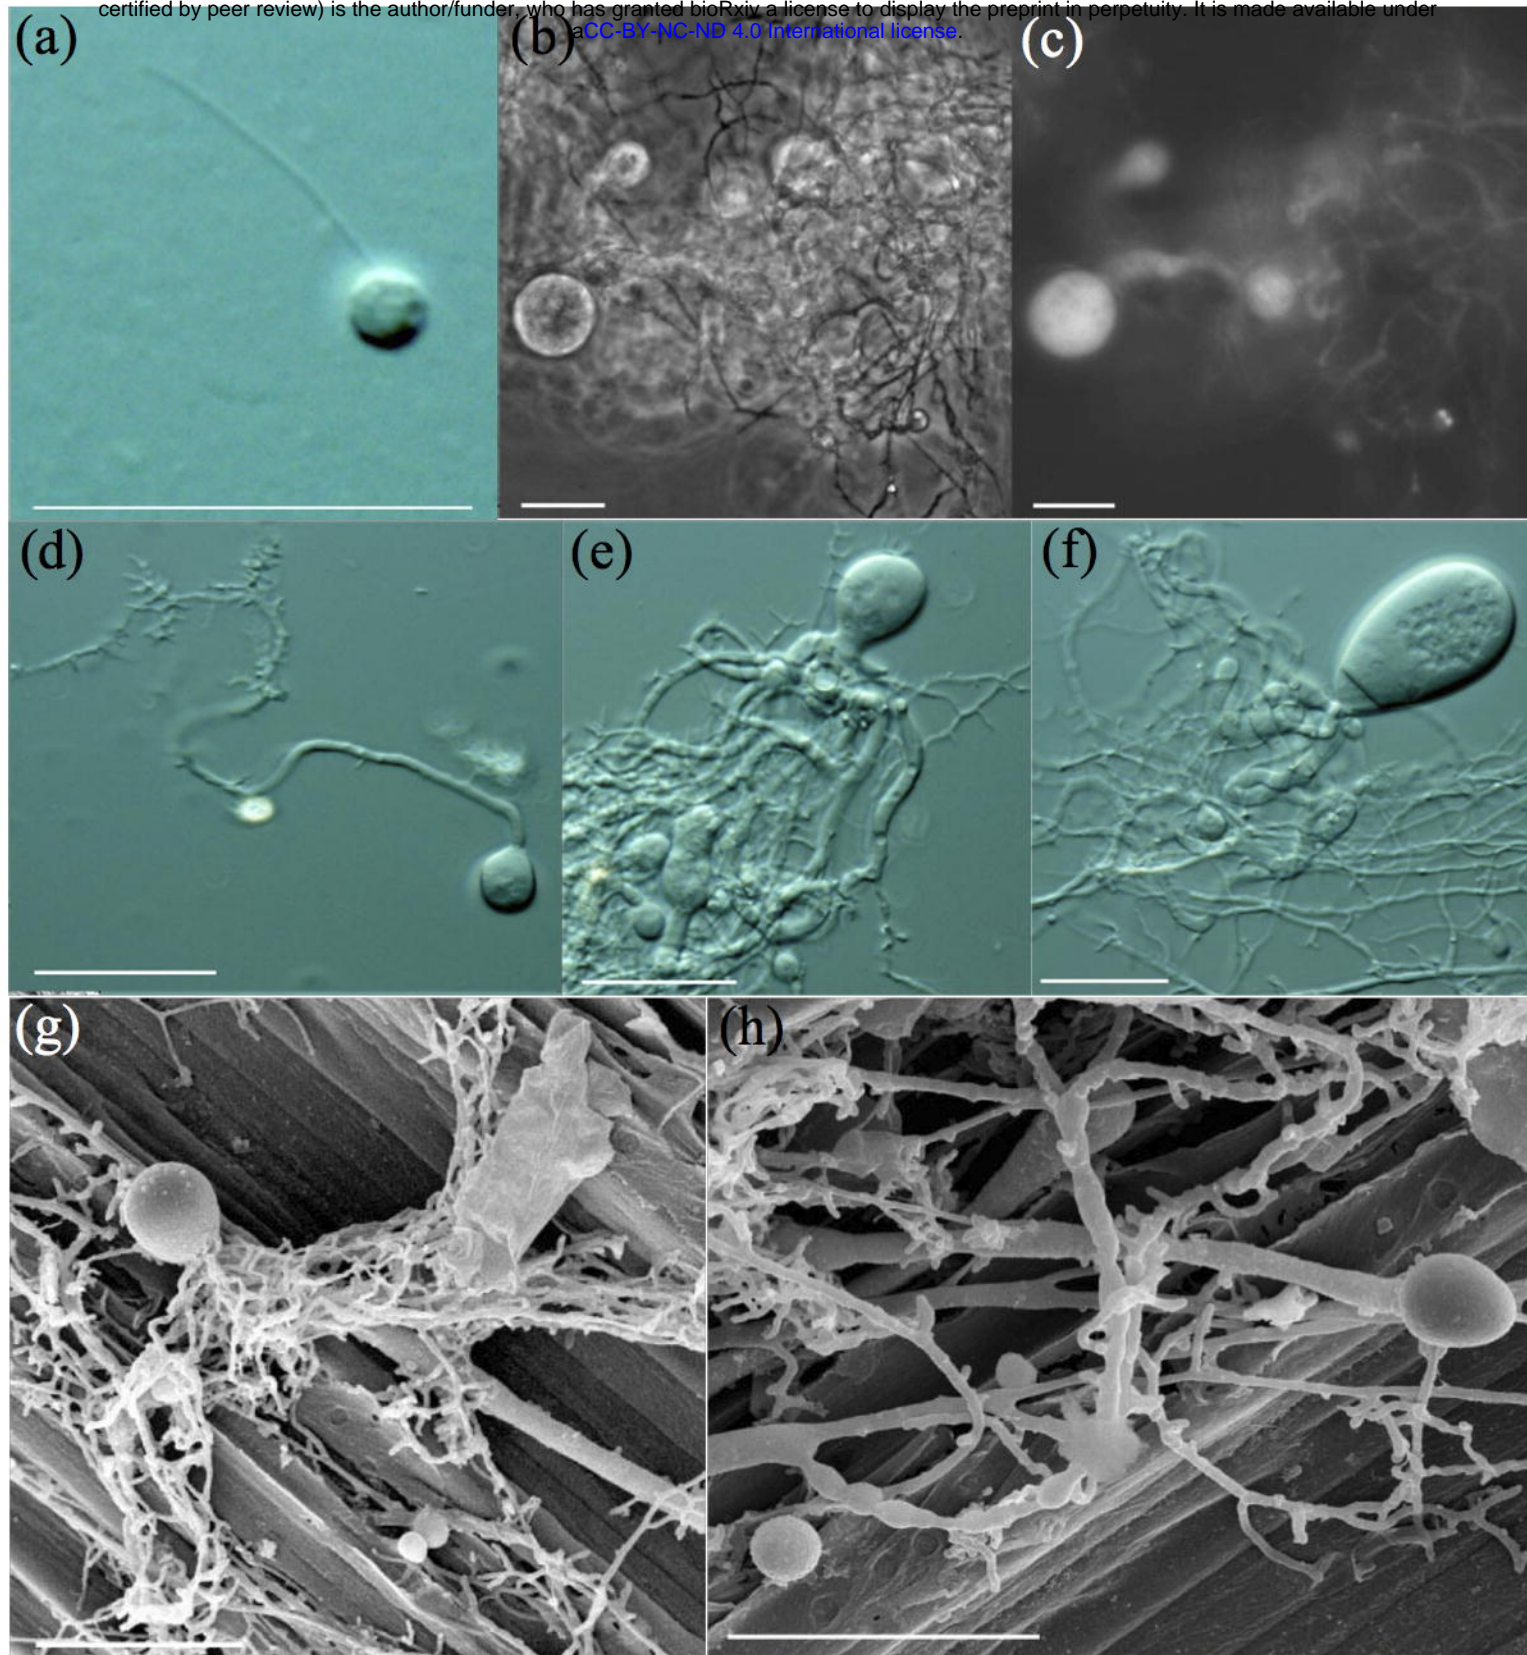

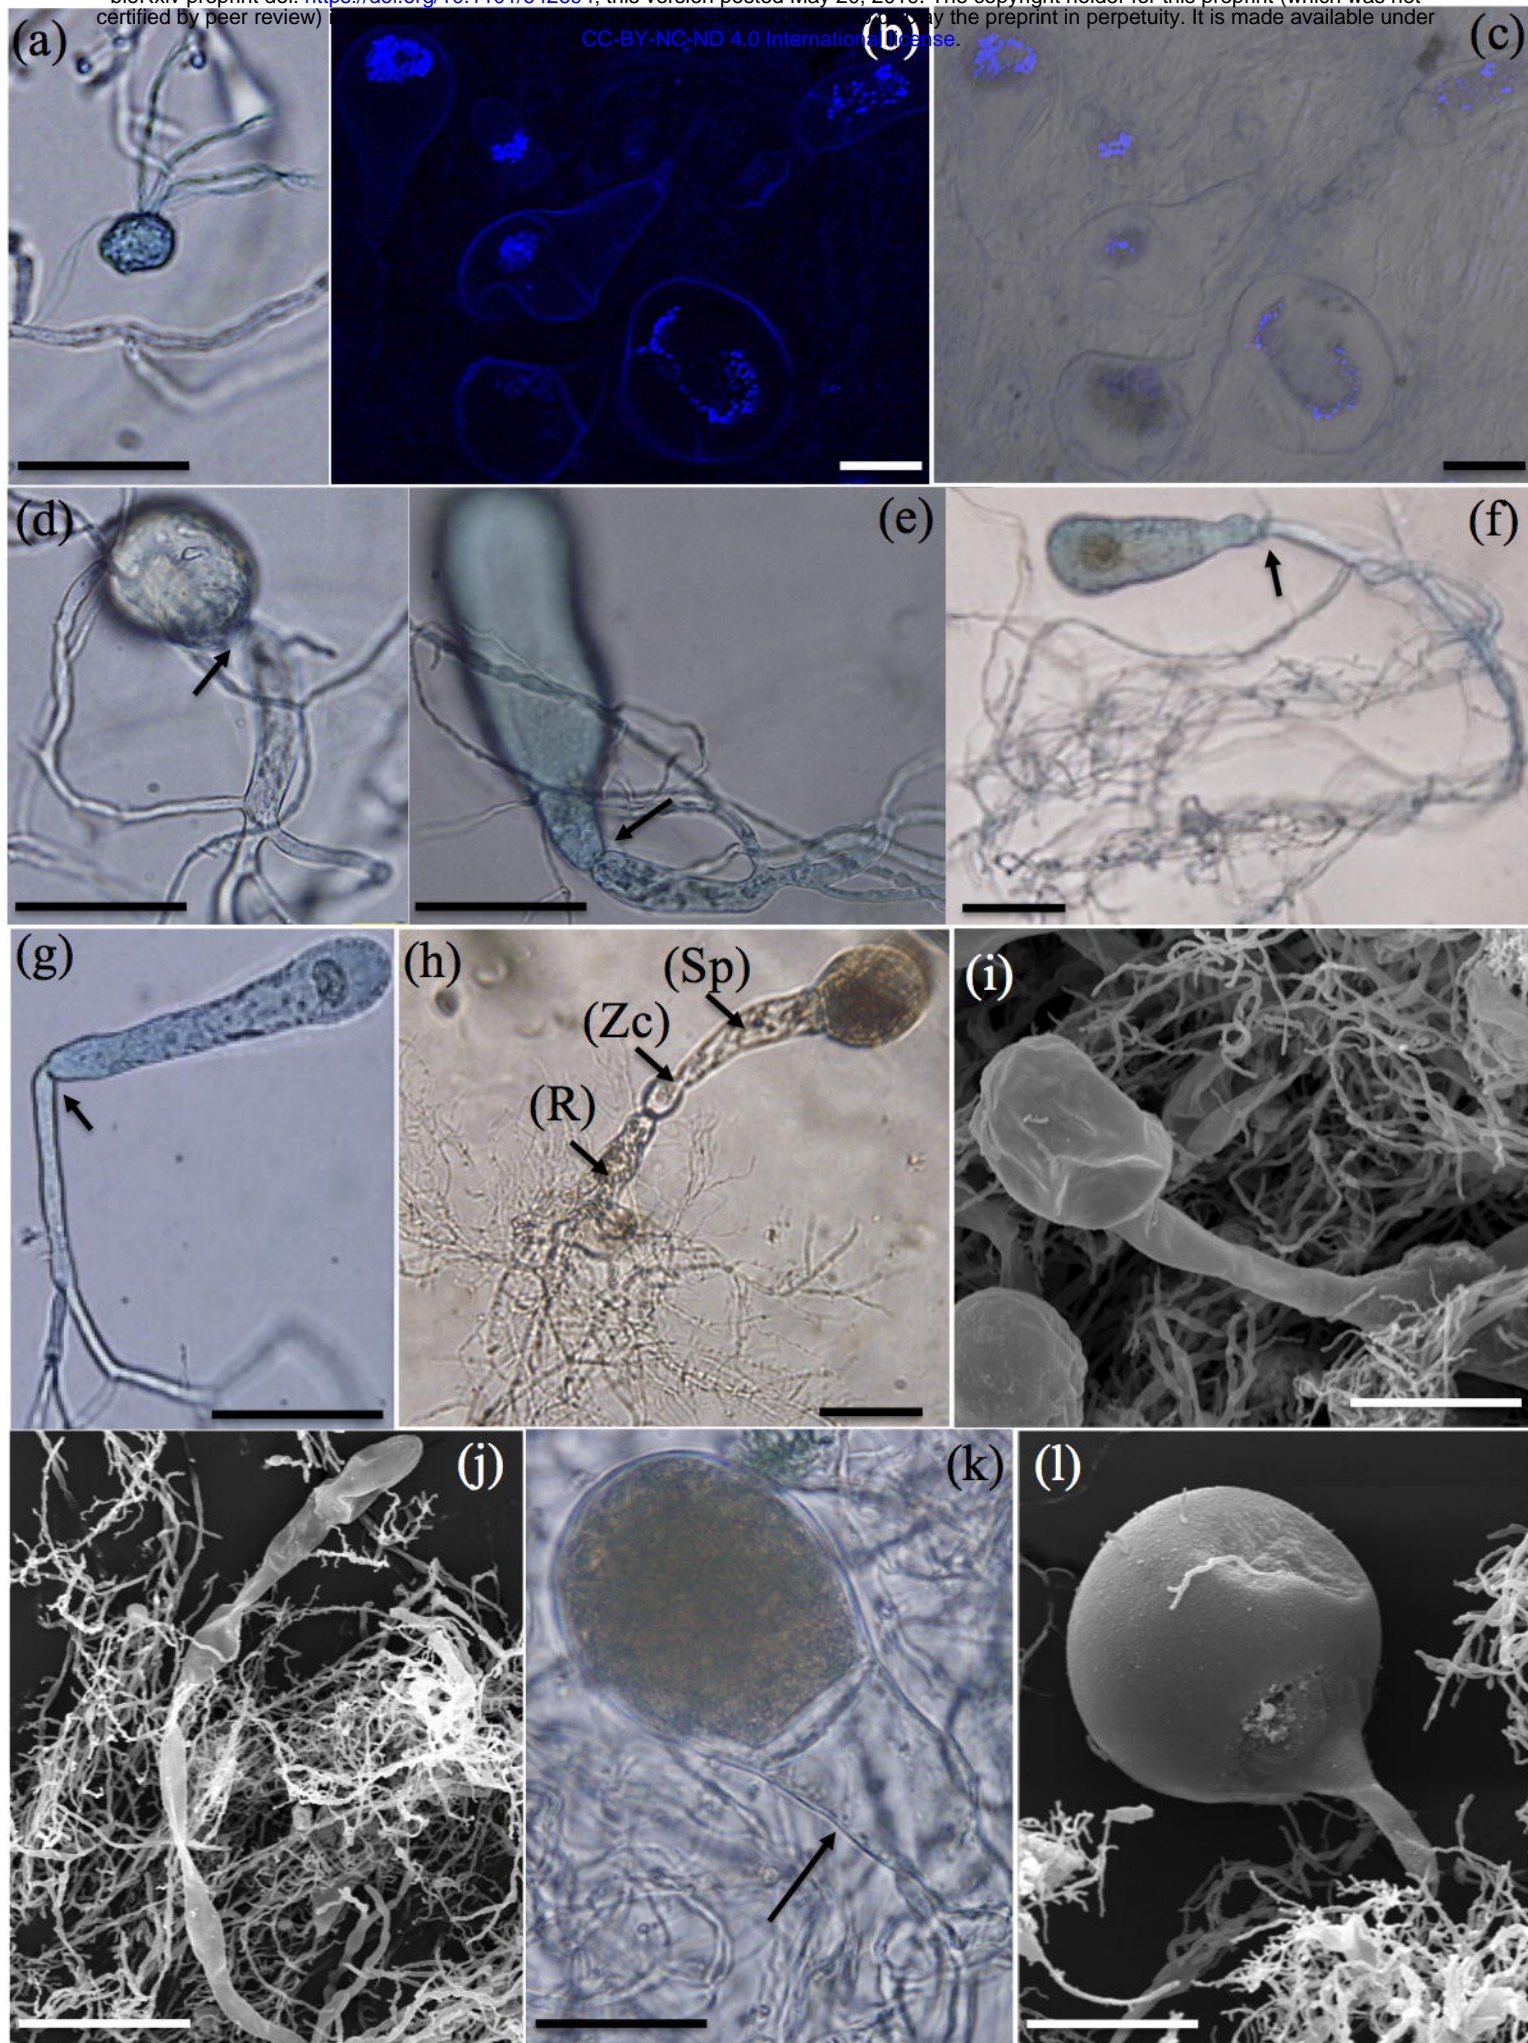

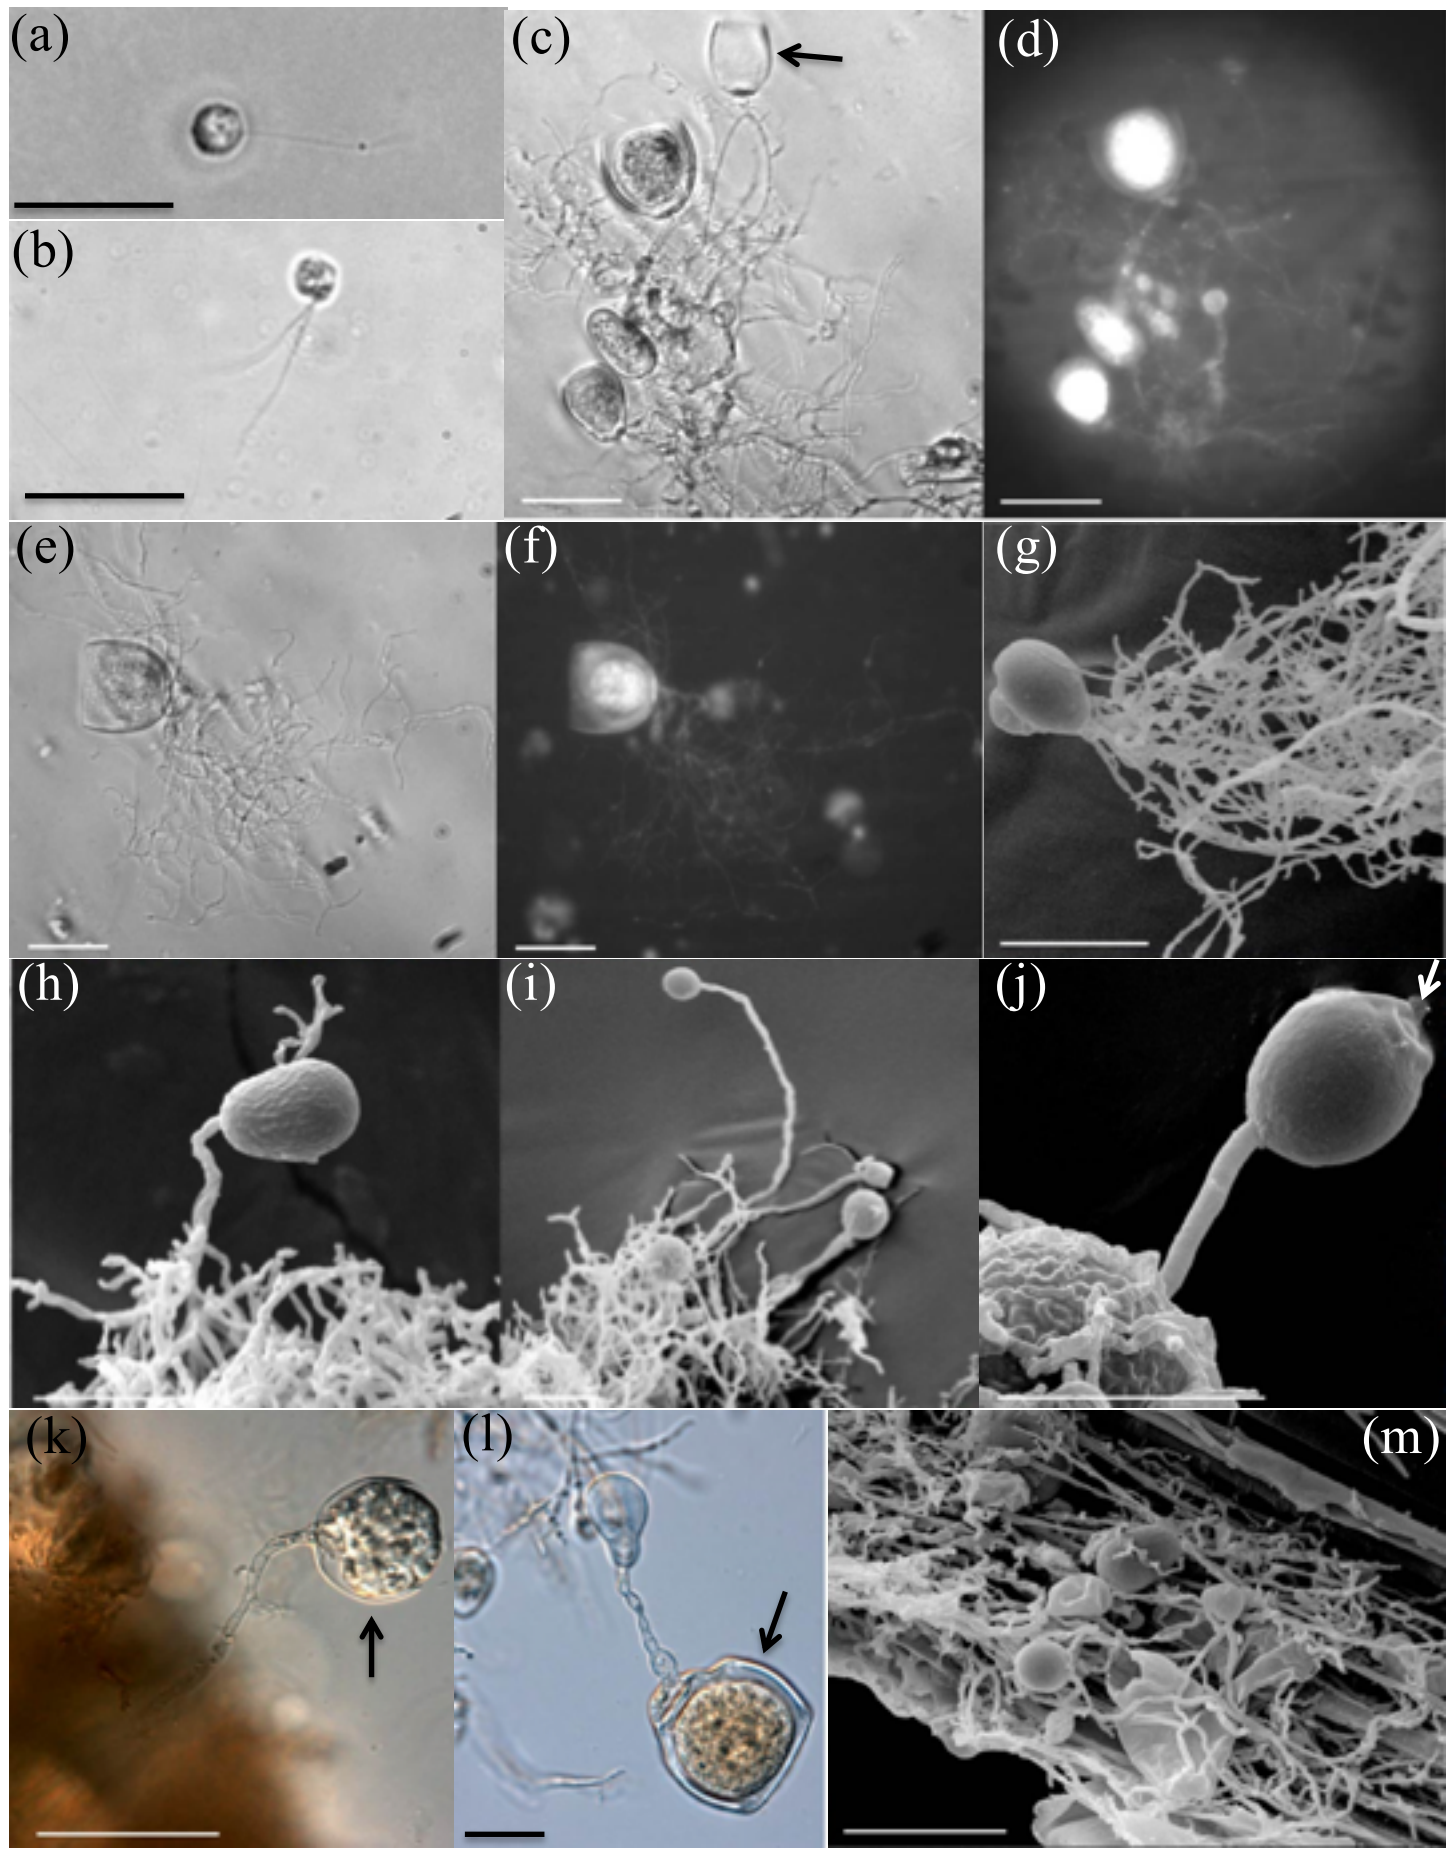

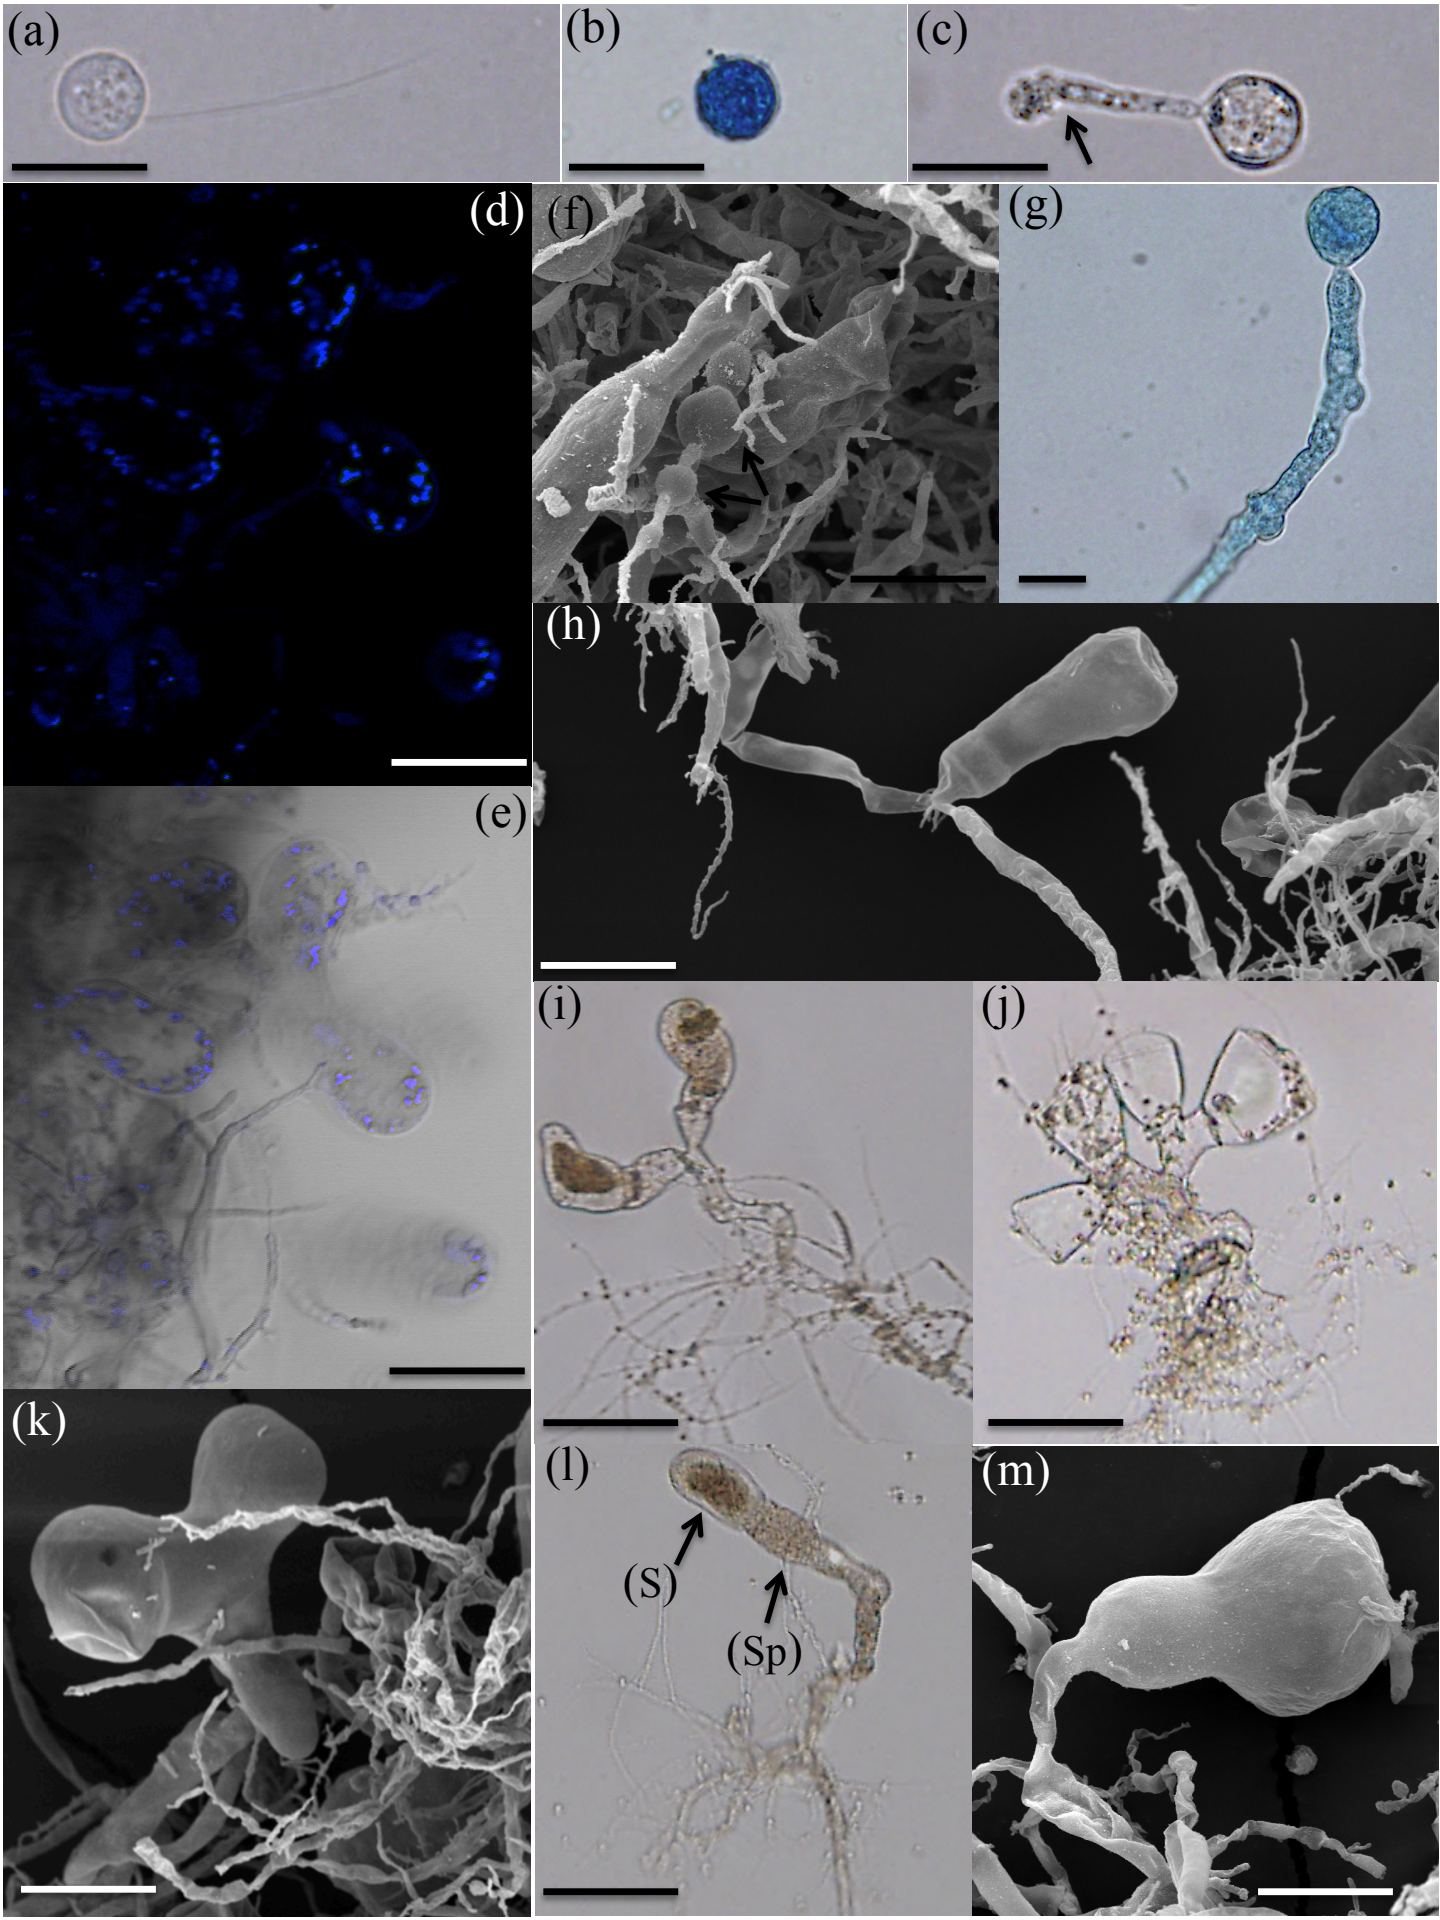

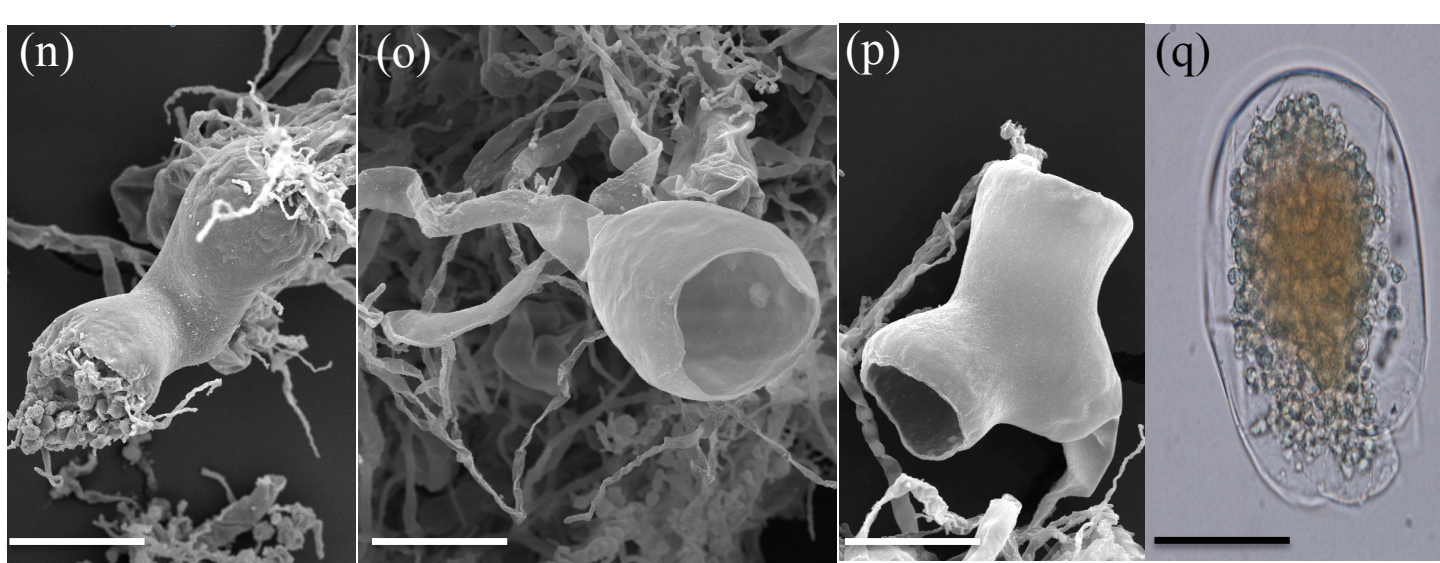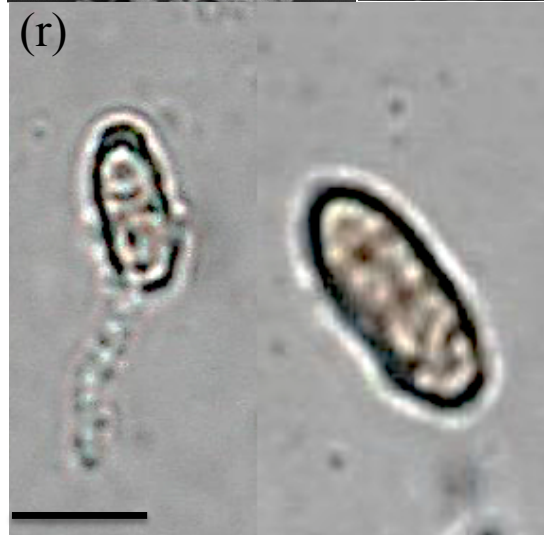

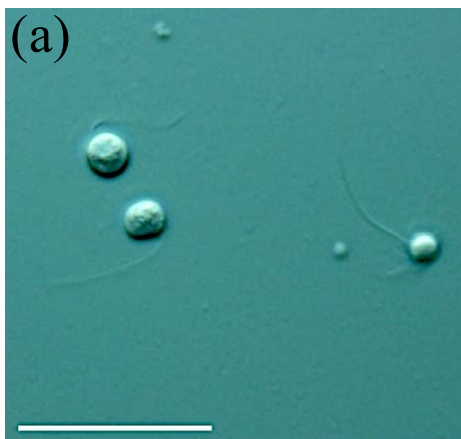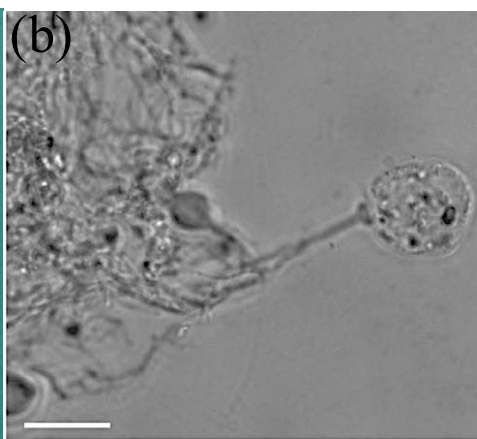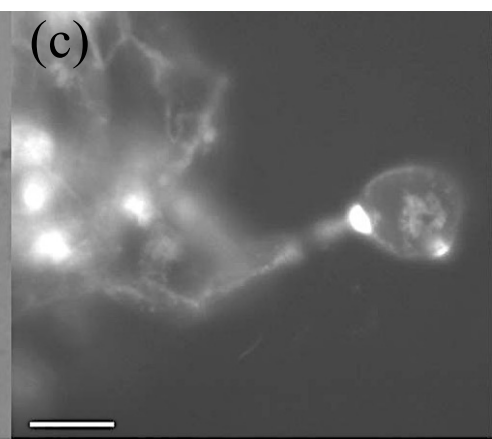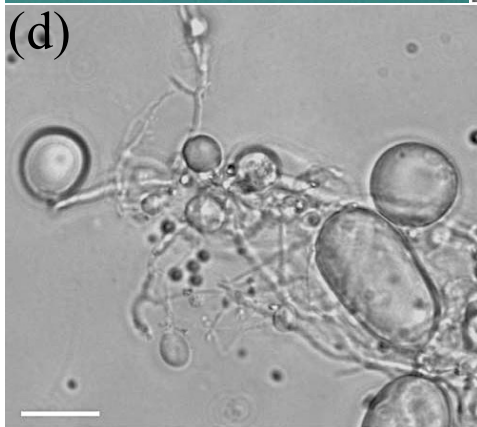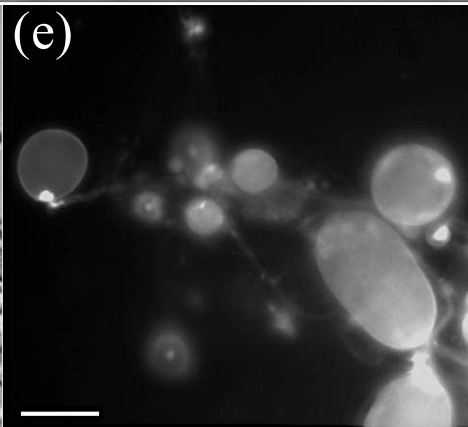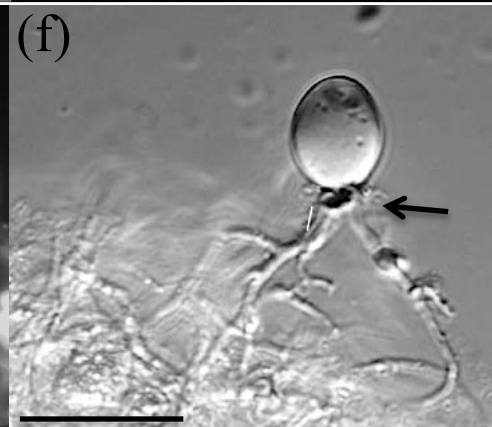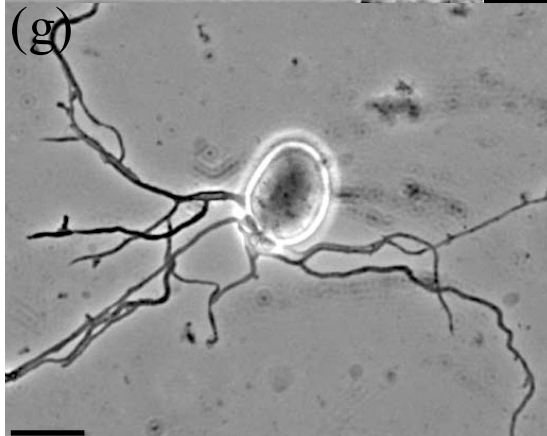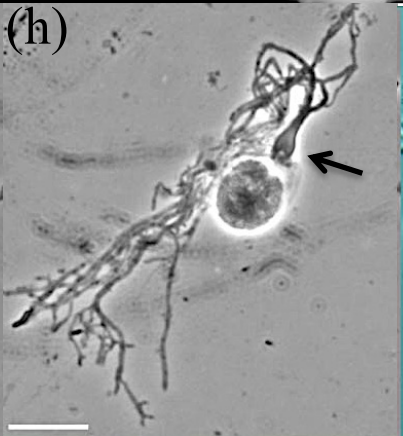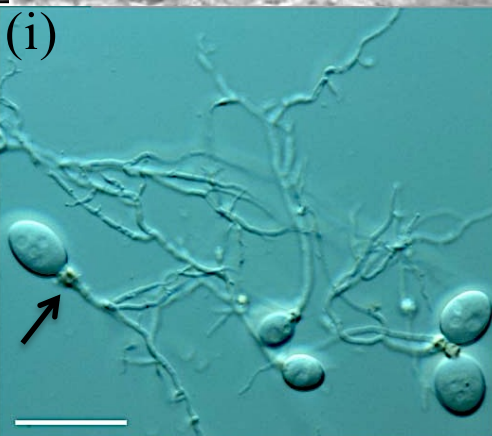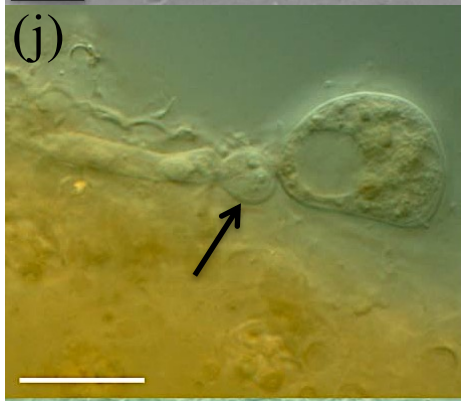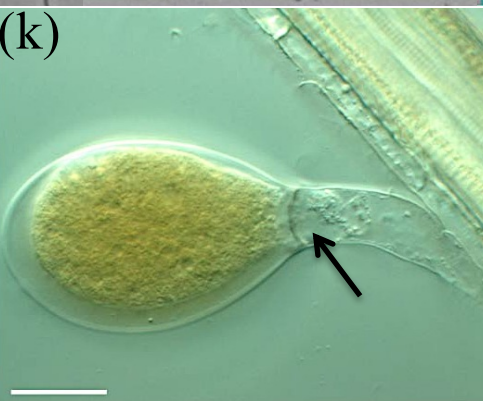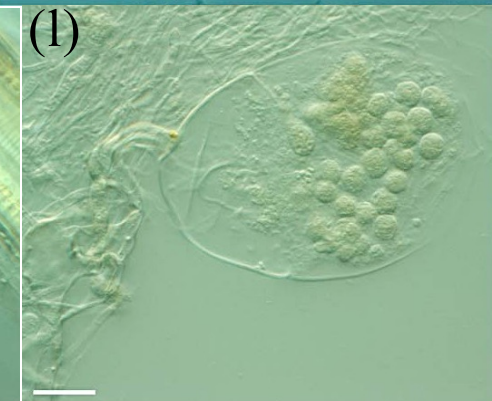



A

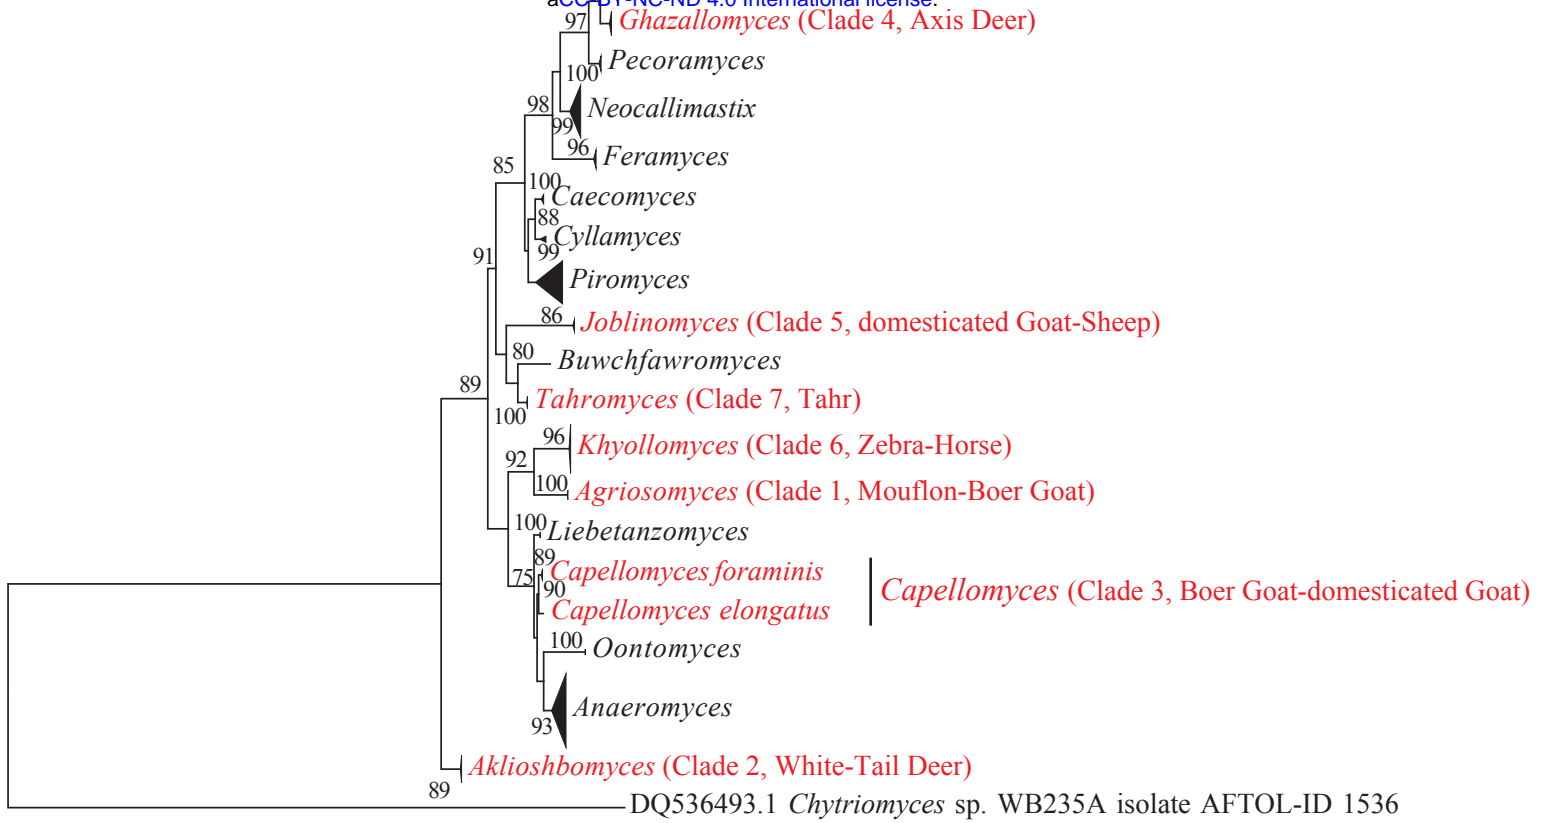

B

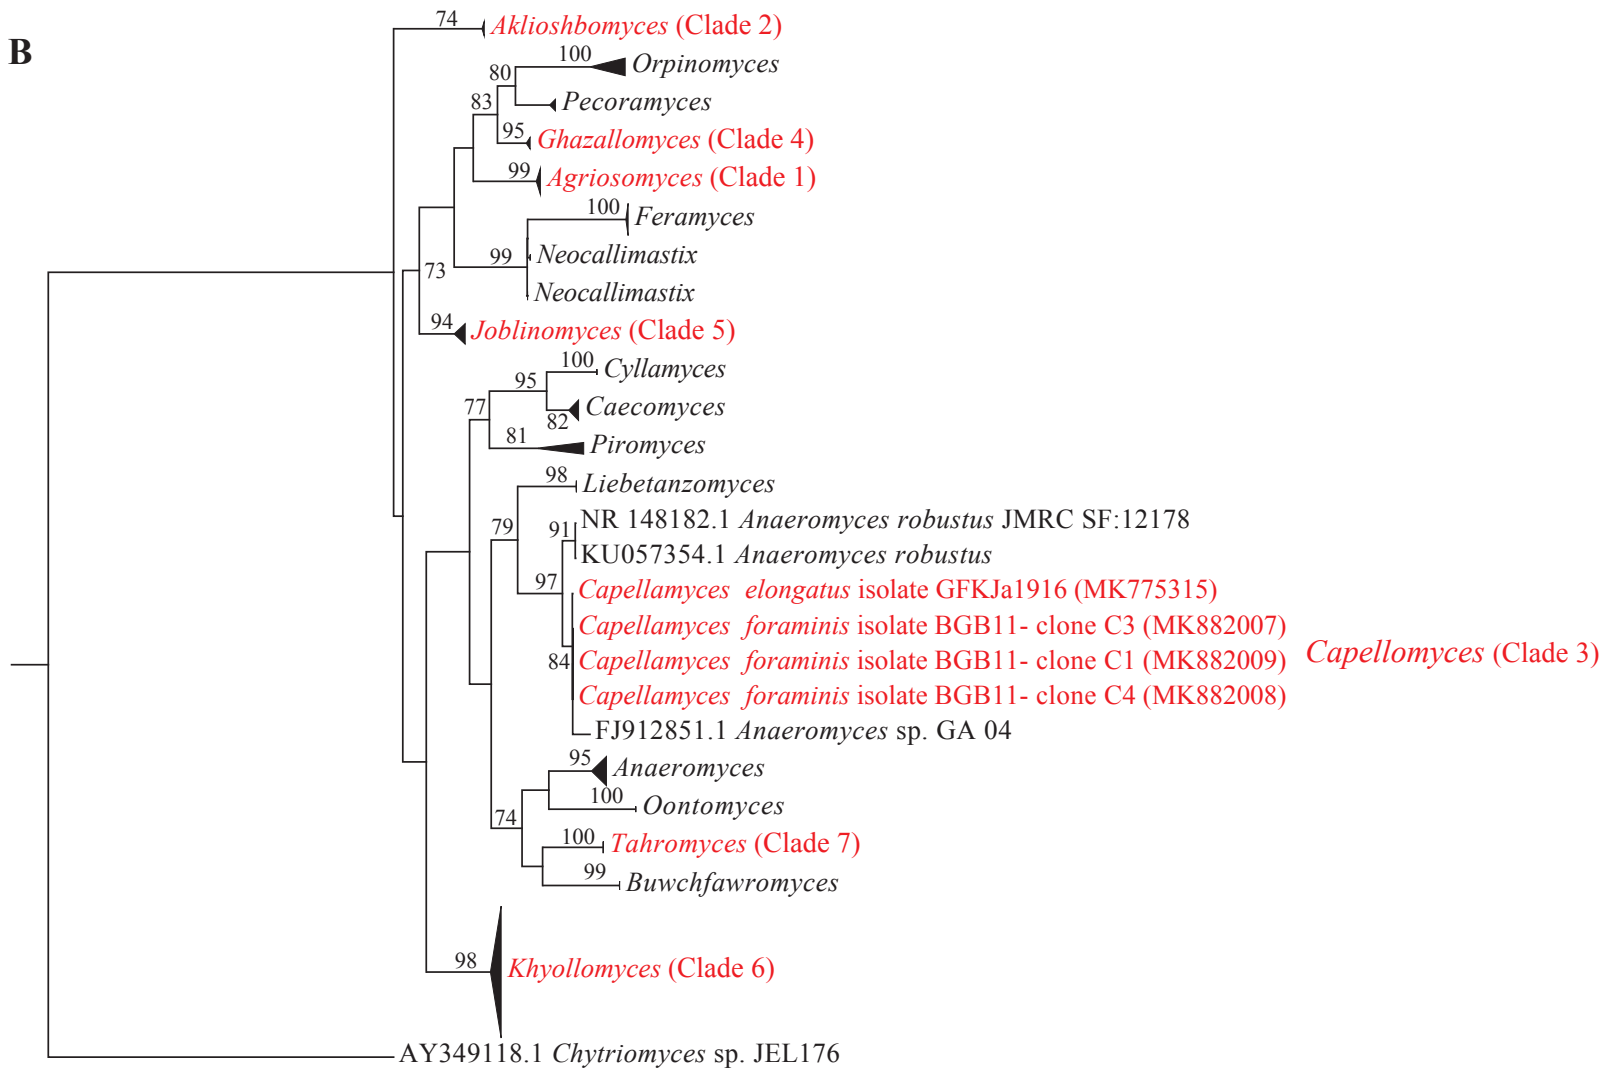

Source: https://www.biorxiv.org/content/10.1101/642694v2.full.pdf
